# Supplementary material for: Pd-Catalyzed sp3C–H alkoxycarbonylation of 8-methylquinolines using Mo(CO)6as a CO surrogate
Source: Royal Society of Chemistry journal article supplement (doi:10.1039/d1cc00465d), 2021-01-01

Supporting Information

**Pd-catalyzed  $sp^3$  C-H alkoxy carbonylation of 8-methylquinolines using  
 $\text{Mo}(\text{CO})_6$  as CO surrogate**

Table of Contents

|   |                                                                        |        |
|---|------------------------------------------------------------------------|--------|
| 1 | General Information                                                    | S2     |
| 2 | General Procedure for the $sp^3$ C-H Alkoxy carbonylation of 8-MQs     | S2     |
| 3 | Procedure for the Scale up Synthesis of <b>3aa</b>                     | S2     |
| 4 | Procedure for the Synthesis of <b>4aa</b>                              | S2-S3  |
| 5 | Procedure for the Synthesis of $[\text{D}_3]$ - <b>1a</b>              | S3     |
| 6 | Mechanistic Investigation                                              | S4-S6  |
| 7 | Characterization Data of <b>3aa-ao</b> , <b>3ba-3ja</b> and <b>4aa</b> | S7-S17 |
| 8 | References                                                             | S17    |
| 9 | NMR Spectra of <b>3aa-3ao</b> , <b>3ba-3ja</b> and <b>4aa</b>          | S18-42 |

**General Information.** Pd(OAc)<sub>2</sub> (≥99.9%), benzoquinone, Mo(CO)<sub>6</sub>, NaOAc, Ag<sub>2</sub>CO<sub>3</sub> (99%), 8-methylquinoline, 5-methylquinoxaline, benzylmercaptan and alcohols were purchased from Aldrich and used as received. The substituted 8-MQs **1b-i**, 8-ethyl-4-phenylquinoline **1j** and 4-methylbenzo[d]oxazole **1l** were prepared according to literature.<sup>1</sup> Merck silica gel G/GF 254 plates were used for analytical TLC and Rankem silica gel (60-120 mesh) was used for column chromatography. NMR (<sup>1</sup>H and <sup>13</sup>C) spectra were recorded in Bruker Avance III 400 and 600 spectrometers using CDCl<sub>3</sub> as solvent and TMS as an internal standard. Chemical shifts (δ) and spin-spin coupling constant (*J*) are reported in ppm and in Hz, respectively, and other data are reported as follows: s = singlet, d = doublet, dd = doublet of doublet, t = triplet, m = multiplet and q = quartet. Melting points were determined using a Büchi B-540 apparatus and are uncorrected. IR spectra were collected on a PerkinElmer Fourier transform infrared (FT-IR) spectrometer. Quadrupole time-of-flight electrospray ionization (ESI) mass spectrometer (model HAB 273) was used for mass analysis.

**General Procedure for the sp<sup>3</sup> C-H Alkoxy carbonylation of 8-MQs.** 8-MQ **1** (0.2 mmol), alcohol **2** (2 mmol), Pd(OAc)<sub>2</sub> (10 mol %, 4.4 mg), BQ (0.2 mmol, 21.2 mg), Mo(CO)<sub>6</sub> (0.2 mmol, 52.8 mg) and Ag<sub>2</sub>CO<sub>3</sub> (0.3 mmol, 83 mg) were stirred at 100 °C for 24 h in 1,2-dichloroethane (2 mL) in a sealed tube. The mixture was diluted with dichloromethane (10 mL) and passed through a short pad of celite. The organic layer was washed with brine (5 mL) and water (5 mL). Drying (Na<sub>2</sub>SO<sub>4</sub>) and evaporation of the solvent gave a residue that was purified on silica gel column chromatography using *n*-hexane/EtOAc (10:2) as eluent to afford the desired **3**.

**Scale-up Synthesis of 3aa.** 8-Methylquinoline **1a** (5 mmol, 715 mg), EtOH **2** (50 mmol, 2.3 g), Pd(OAc)<sub>2</sub> (10 mol %, 110 mg), BQ (5 mmol, 530 mg), Mo(CO)<sub>6</sub> (5 mmol, 1.32 g) and Ag<sub>2</sub>CO<sub>3</sub> (7.5 mmol, 2 g) were subjected to the above described standard reaction condition. The mixture was diluted with dichloromethane (20 mL) and passed through a celite pad and washed with brine (5 mL) and water (5 mL). The organic layer was dried over Na<sub>2</sub>SO<sub>4</sub> and the solvent was evaporated to produce a residue, which was purified by column chromatography on silica gel using *n*-hexane/EtOAc (10:2) as eluent to afford **3aa** in 54% (580 mg) yield.

**Synthesis of 4aa.**<sup>2</sup> 3-Chloroperbenzoic acid (0.2 mmol, 34.5 mg) was added to a stirred solution of ethyl 2-(quinolin-8-yl)acetate **3aa** (0.2 mmol, 43 mg) in CH<sub>2</sub>Cl<sub>2</sub> (1 mL) at 0 °C. The reaction mixture was allowed to stir at room temperature for 24 h and then treated with an aqueous

NaHCO<sub>3</sub>. The resultant mixture was extracted with CH<sub>2</sub>Cl<sub>2</sub> (10 mL) and the organic phase was washed with brine (3 mL) and water (3 mL). The organic layer was dried over Na<sub>2</sub>SO<sub>4</sub> and the solvent was evaporated under reduced pressure to give the residue, which was purified by column chromatography on silica gel using EtOAc /MeOH (8:1) as an eluent.

**Synthesis of [D<sub>3</sub>]-1a.** 8-MQ **1a** (0.3 mmol, 43.0 mg), [RhCp\*Cl<sub>2</sub>]<sub>2</sub> (2.5 mol %, 4.6 mg), AcOD (0.9 mmol, 54.1 mg), Cu(OAc)<sub>2</sub> (0.6 mmol, 109.0 mg) and D<sub>2</sub>O (1 mL) were stirred at 100 °C for 20 h. The resultant mixture was extracted with EtOAc (10 mL) and the organic layer was dried over Na<sub>2</sub>SO<sub>4</sub>. Evaporation of the solvent gave a residue that was purified on silica gel column chromatography using *n*-hexane/EtOAc (10:1) to afford [D<sub>3</sub>]-**1a** in 90% yield. The deuterium incorporation was determined using 400 MHz <sup>1</sup>H NMR as 98%.

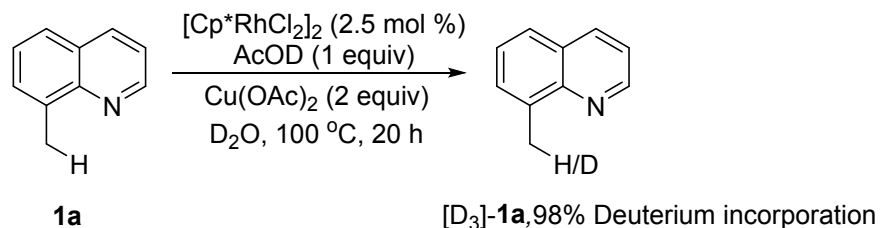

KT-211-N

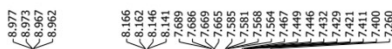

— 2.789

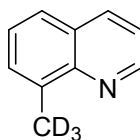

[D<sub>3</sub>]-**1a**, 98% Deuterium incorporation

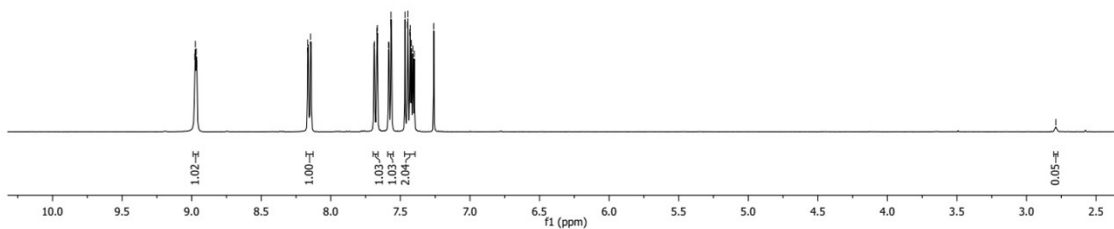

## Mechanistic Investigations

**H/D Exchange Experiment with D<sub>2</sub>O.** 8-MQ **1a** (0.2 mmol, 28.6 mg), Pd(OAc)<sub>2</sub> (10 mol %, 4.4 mg), BQ (0.2 mmol, 21.2 mg), Mo(CO)<sub>6</sub> (0.2 mmol, 52.8 mg), Ag<sub>2</sub>CO<sub>3</sub> (0.3 mmol, 83 mg) and D<sub>2</sub>O (2 mmol) were stirred in 1,2-dichloroethane at 100 °C for 24 h in a sealed tube. The work-up and purification were performed as described in the general procedure. 400 MHz <sup>1</sup>H NMR spectrum of the product showed no deuterium incorporation.

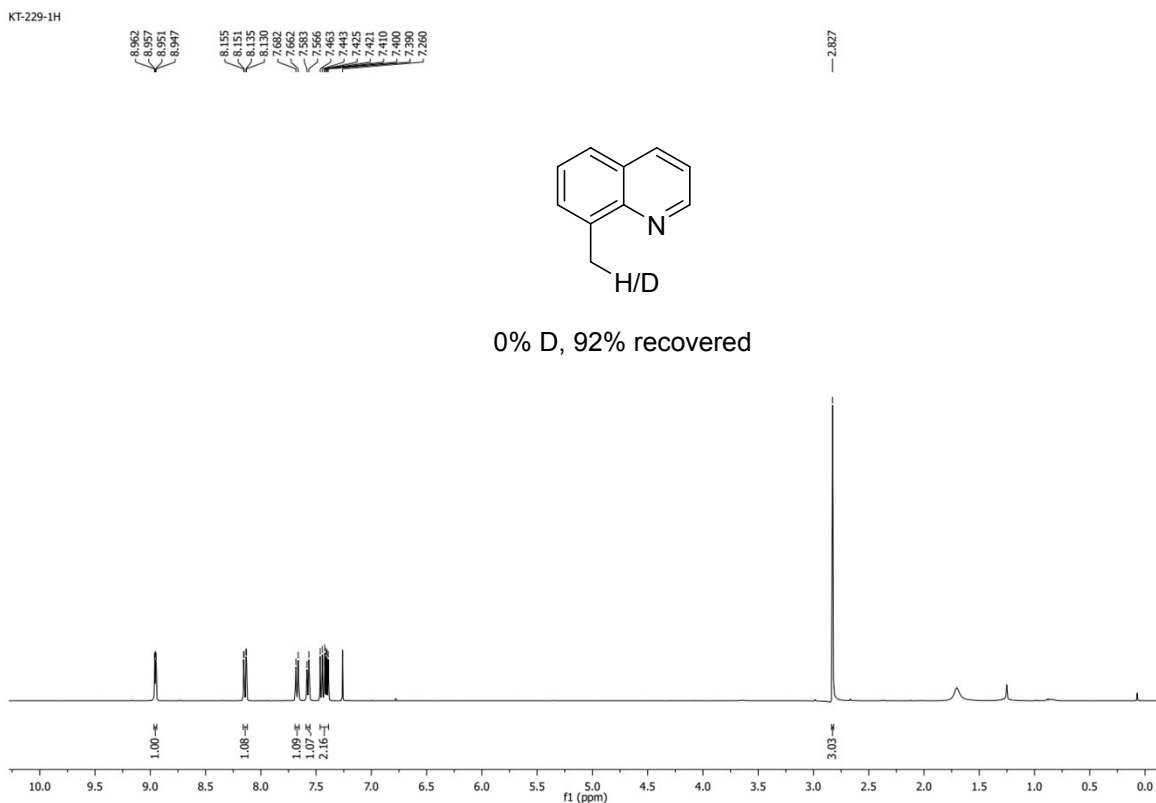

**H/D Exchange Experiment with D<sub>2</sub>O in Presence of Alcohol.** 8-Methylquinoline **1a** (0.2 mmol, 28.6 mg), EtOH (2 mmol, 92 mg), Pd(OAc)<sub>2</sub> (10 mol %, 4.4 mg), BQ (0.2 mmol, 21.2 mg), Mo(CO)<sub>6</sub> (0.2 mmol, 52.8 mg), Ag<sub>2</sub>CO<sub>3</sub> (0.3 mmol, 83 mg) and D<sub>2</sub>O (2 mmol) were stirred in 1,2-dichloroethane at 100 °C for 24 h. The work-up and purification was performed as above, and the 400 MHz <sup>1</sup>H NMR spectrum of the product revealed no deuterium incorporation.

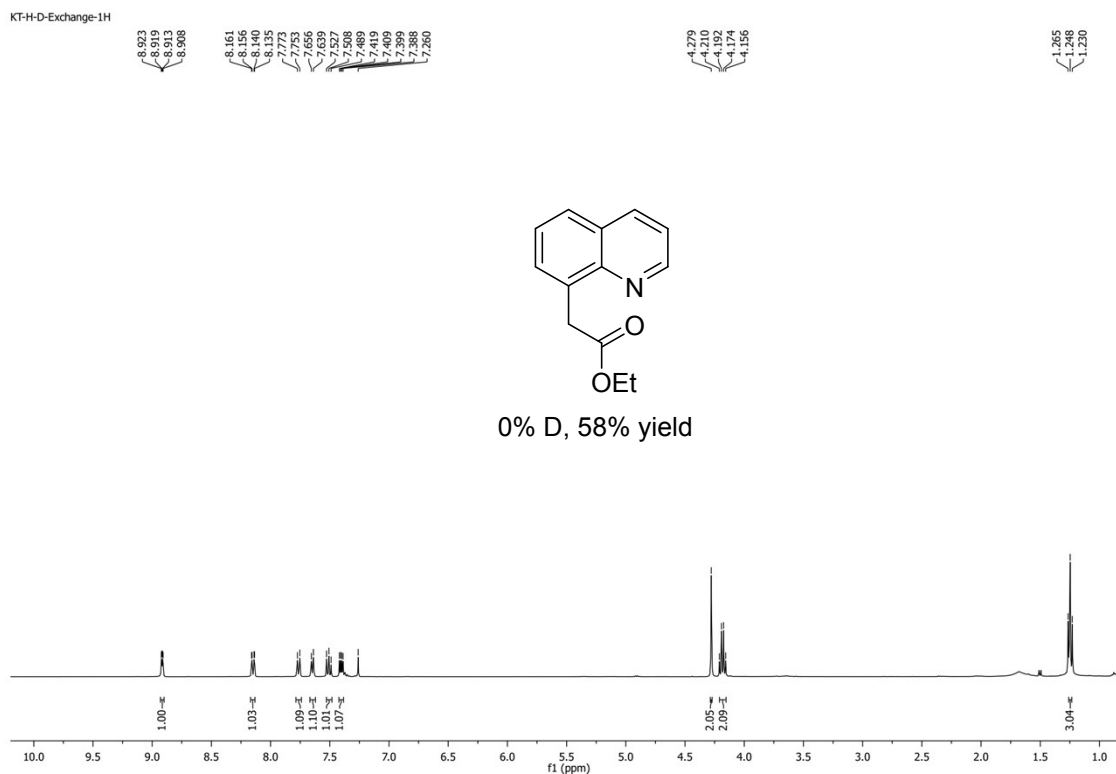

**Kinetic Isotope Effect Experiment.** A mixture of 8-Methylquinoline **1a** (0.2 mmol, 28.6 mg) and  $[D_3]$ -**1a** (0.2 mmol, 29.2 mg) was reacted with EtOH **2a** (2 mmol, 92 mg) for 2 h under standard reaction conditions. The reaction mixture was diluted with DCM (5 mL), and passed through a short pad of celite using DCM (3 x 5 mL). Drying ( $Na_2SO_4$ ) and evaporation of the solvent on vacuo produced a residue, which was purified on silica gel column chromatography on silica gel using *n*-hexane and EtOAc (10:2) as eluent to afford **3aa**/ $[D_2]$ -**3aa**. The intermolecular  $k_H/k_D$  was found to be 1.13, based on the 400 MHz  $^1H$  NMR spectroscopy.

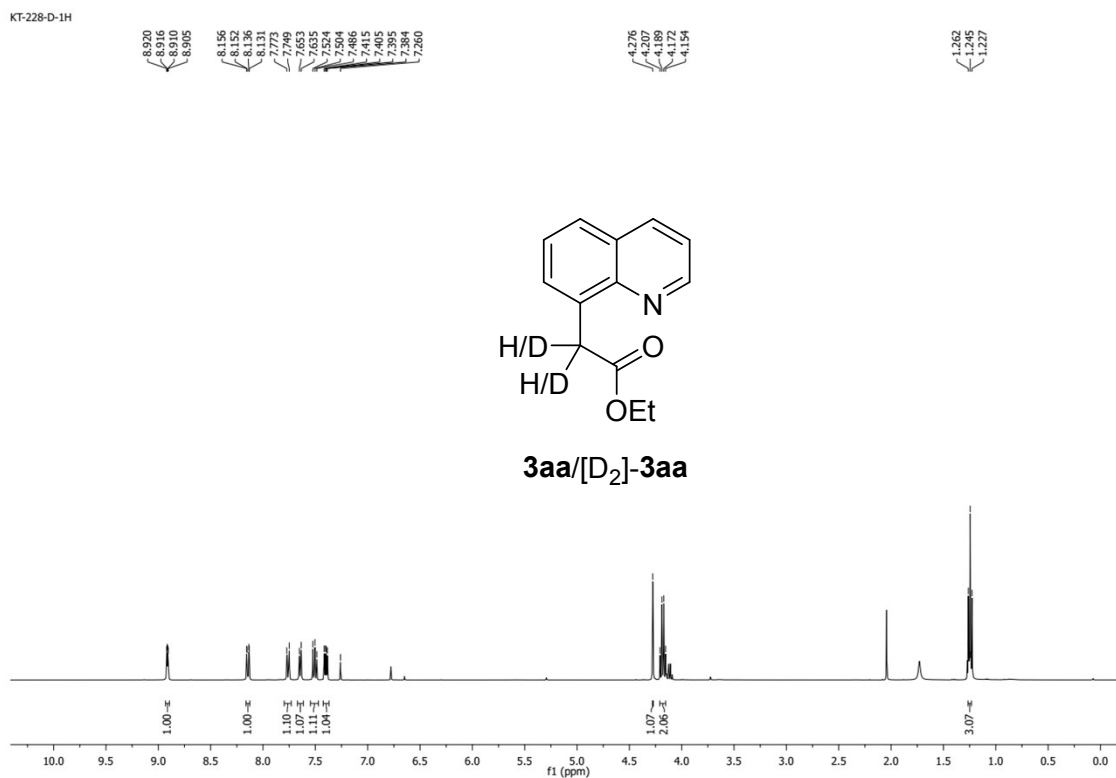

## Characterization data

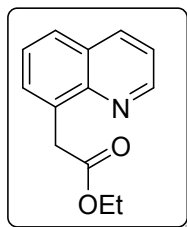

**Ethyl 2-(quinolin-8-yl)acetate 3aa.** Yellow liquid; yield 76% (33 mg);  $^1\text{H}$  NMR (400 MHz,  $\text{CDCl}_3$ )  $\delta$  8.91 (q,  $J = 2.4$  Hz, 1H), 8.15 (dd,  $J = 8.4$  Hz, 6.4 Hz, 1H), 7.77 (d,  $J = 8.0$  Hz, 1H), 7.65 (d,  $J = 6.8$  Hz, 1H), 7.50 (t,  $J = 7.6$  Hz, 1H), 7.40 (q,  $J = 4.0$  Hz, 1H), 4.27 (s, 2H), 4.19 (q,  $J = 7.2$  Hz, 2H), 1.24 (t,  $J = 6.8$  Hz, 3H);  $^{13}\text{C}$  NMR (100 MHz,  $\text{CDCl}_3$ )  $\delta$  172.4, 149.7, 146.8, 136.3, 133.6, 130.4, 128.4, 127.5, 126.3, 121.2, 60.8, 37.3, 14.3; FT-IR (neat) 2980, 2924, 2852, 1729, 1499, 1367, 1026, 830, 797  $\text{cm}^{-1}$ ; HRMS (ESI)  $m/z$   $[\text{M}+\text{H}]^+$  calcd for  $\text{C}_{13}\text{H}_{14}\text{NO}_2^+$ : 216.1019, found: 216.1025.

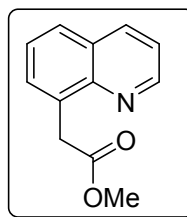

**Methyl 2-(quinolin-8-yl)acetate 3ab.** Yellow liquid; yield 73% (29 mg);  $^1\text{H}$  NMR (400 MHz,  $\text{CDCl}_3$ )  $\delta$  8.92 (q,  $J = 2.4$  Hz, 1H), 8.15 (dd,  $J = 8.0$  Hz, 6.4 Hz, 1H), 7.78 (d,  $J = 8.4$  Hz, 1H), 7.65 (d,  $J = 7.2$  Hz, 1H), 7.51 (t,  $J = 8.0$  Hz, 1H), 7.41 (q,  $J = 4.0$  Hz, 1H), 4.29 (s, 2H), 3.70 (s, 3H);  $^{13}\text{C}$  NMR (100 MHz,  $\text{CDCl}_3$ )  $\delta$  172.8, 149.8, 146.8, 136.3, 133.5, 130.4, 128.5, 127.6, 126.3, 121.3, 52.1, 37.0; FT-IR (neat) 2952, 2921, 2852, 1734, 1499, 1259, 1171, 1014, 794, 733  $\text{cm}^{-1}$ ; HRMS (ESI)  $m/z$   $[\text{M}+\text{H}]^+$  calcd for  $\text{C}_{12}\text{H}_{12}\text{NO}_2^+$ : 202.0863, found: 202.0868.

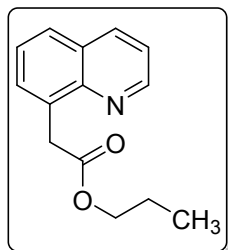

**Propyl 2-(quinolin-8-yl)acetate 3ac.** Yellow liquid; yield 71% (32 mg);  $^1\text{H}$  NMR (400 MHz,  $\text{CDCl}_3$ )  $\delta$  8.91 (q,  $J = 2.8$  Hz, 1H), 8.15 (dd,  $J = 8.0$  Hz, 6.4 Hz, 1H), 7.77 (d,  $J = 8.4$  Hz, 1H), 7.65 (d,  $J = 7.2$  Hz, 1H), 7.50 (t,  $J = 7.6$  Hz, 1H), 7.40 (q,  $J = 4.0$  Hz, 1H), 4.29 (s, 2H), 4.07 (t,  $J = 6.8$  Hz, 2H), 1.66-1.58 (m, 2H), 0.85 (t,  $J = 7.6$  Hz, 3H);  $^{13}\text{C}$  NMR (100 MHz,

CDCl<sub>3</sub>)  $\delta$  172.4, 149.7, 146.9, 136.3, 133.7, 130.3, 128.4, 127.4, 126.3, 121.2, 66.4, 37.3, 22.0, 10.4; FT-IR (neat) 2965, 2934, 2877, 1730, 1499, 1336, 1153, 1059, 794, 762 cm<sup>-1</sup>; HRMS (ESI)  $m/z$  [M+H]<sup>+</sup> calcd for C<sub>14</sub>H<sub>16</sub>NO<sub>2</sub><sup>+</sup>: 230.1176, found: 203.1175.

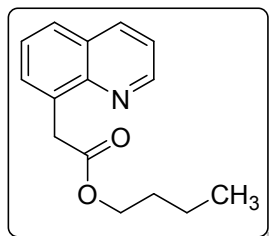

**Butyl 2-(quinolin-8-yl)acetate 3ad.** Yellow liquid; yield 74% (36 mg); <sup>1</sup>H NMR (400 MHz, CDCl<sub>3</sub>)  $\delta$  8.91 (q,  $J$  = 2.4 Hz, 1H), 8.15 (dd,  $J$  = 8.0 Hz, 6.4 Hz, 1H), 7.77 (d,  $J$  = 9.2 Hz, 1H), 7.65 (d,  $J$  = 7.2 Hz, 1H), 7.50 (t,  $J$  = 7.6 Hz, 1H), 7.40 (q,  $J$  = 4.0 Hz, 1H), 4.27 (s, 2H), 4.11 (t,  $J$  = 6.8 Hz, 2H), 1.61-1.54 (m, 2H), 1.33-1.25 (m, 2H), 0.86 (t,  $J$  = 7.6 Hz, 3H); <sup>13</sup>C NMR (100 MHz, CDCl<sub>3</sub>)  $\delta$  172.5, 149.7, 146.9, 136.3, 133.7, 130.3, 128.4, 127.4, 126.3, 121.2, 64.7, 37.3, 30.7, 19.1, 13.8; FT-IR (neat) 2958, 1730, 1499, 1338, 1258, 1172, 1061, 794, 763 cm<sup>-1</sup>; HRMS (ESI)  $m/z$  [M+H]<sup>+</sup> calcd for C<sub>15</sub>H<sub>18</sub>NO<sub>2</sub><sup>+</sup>: 244.1332, found: 244.1337.

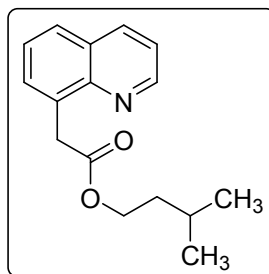

**Isopentyl 2-(quinolin-8-yl)acetate 3ae.** Yellow liquid; yield 70% (36 mg); <sup>1</sup>H NMR (400 MHz, CDCl<sub>3</sub>)  $\delta$  8.91 (q,  $J$  = 2.4 Hz, 1H), 8.15 (dd,  $J$  = 8.0 Hz, 6.4 Hz, 1H), 7.76 (d,  $J$  = 8.4 Hz, 1H), 7.64 (d,  $J$  = 6.8 Hz, 1H), 7.50 (t,  $J$  = 8.0 Hz, 1H), 7.40 (q,  $J$  = 4.0 Hz, 1H), 4.27 (s, 2H), 4.14 (t,  $J$  = 6.8 Hz, 2H), 1.61-1.53 (m, 1H), 1.49 (q,  $J$  = 6.8 Hz, 2H), 0.85 (s, 3H), 0.83 (s, 3H); <sup>13</sup>C NMR (100 MHz, CDCl<sub>3</sub>)  $\delta$  172.4, 149.7, 146.9, 136.3, 133.7, 130.3, 128.4, 127.5, 126.3, 121.2, 63.5, 37.4, 25.1, 22.5; FT-IR (neat) 2956, 1731, 1499, 1367, 1258, 1154, 1049, 981, 794, 761 cm<sup>-1</sup>; HRMS (ESI)  $m/z$  [M+H]<sup>+</sup> calcd for C<sub>16</sub>H<sub>20</sub>NO<sub>2</sub><sup>+</sup>: 258.1489, found: 258.1493.



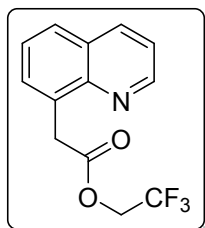

**2,2,2-Trifluoroethyl 2-(quinolin-8-yl)acetate 3af.** Colorless liquid; yield 75% (40 mg);  $^1\text{H}$  NMR (400 MHz,  $\text{CDCl}_3$ )  $\delta$  8.90 (q,  $J = 2.4$  Hz, 1H), 8.16 (dd,  $J = 8.4$  Hz, 6.4 Hz, 1H), 7.80 (d,  $J = 8.0$  Hz, 1H), 7.65 (d,  $J = 6.4$  Hz, 1H), 7.51 (t,  $J = 8.0$  Hz, 1H), 7.42 (q,  $J = 4.0$  Hz, 1H), 4.52 (q,  $J = 7.6$  Hz, 2H), 4.36 (s, 2H);  $^{13}\text{C}$  NMR (100 MHz,  $\text{CDCl}_3$ )  $\delta$  170.8, 149.8, 146.7, 136.3, 132.5, 130.4, 128.4, 127.9, 126.3, 124.5 (q,  $J_{\text{C-F}} = 275.7$ ), 121.4, 60.8 (q,  $J_{\text{C-F}} = 36.3$ ), 36.7;  $^{19}\text{F}$  NMR (377 MHz,  $\text{CDCl}_3$ )  $\delta$  -73.6; FT-IR (neat) 2921, 2852, 1716, 1595, 1401, 1279, 979, 812, 764  $\text{cm}^{-1}$ ; HRMS (ESI)  $m/z$   $[\text{M}+\text{H}]^+$  calcd for  $\text{C}_{13}\text{H}_{11}\text{F}_3\text{NO}_2^+$ : 270.0736, found: 270.0740.

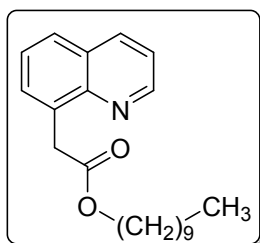

**Decyl 2-(quinolin-8-yl)acetate 3ag.** Yellow liquid; yield 68% (44 mg);  $^1\text{H}$  NMR (400 MHz,  $\text{CDCl}_3$ )  $\delta$  8.91 (q,  $J = 2.4$  Hz, 1H), 8.15 (dd,  $J = 8.4$  Hz, 6.4 Hz, 1H), 7.77 (d,  $J = 8.4$  Hz, 1H), 7.65 (d,  $J = 6.8$  Hz, 1H), 7.50 (t,  $J = 7.6$  Hz, 1H), 7.40 (q,  $J = 4.0$  Hz, 1H), 4.27 (s, 2H), 4.10 (t,  $J = 6.8$  Hz, 2H), 1.59-1.54 (m, 1H), 1.31-1.28 (m, 15H), 0.88 (t,  $J = 6.8$  Hz, 3H);  $^{13}\text{C}$  NMR (100 MHz,  $\text{CDCl}_3$ )  $\delta$  172.4, 149.7, 146.9, 136.3, 133.8, 130.3, 128.4, 127.4, 126.3, 121.2, 65.0, 37.3, 32.0, 29.6, 29.4, 29.3, 28.7, 25.9, 22.8, 14.2; FT-IR (neat) 2923, 2853, 1734, 1595, 1338, 1171, 1028, 795, 783  $\text{cm}^{-1}$ ; HRMS (ESI)  $m/z$   $[\text{M}+\text{H}]^+$  calcd for  $\text{C}_{21}\text{H}_{30}\text{NO}_2^+$ : 328.2271, found: 328.2287.

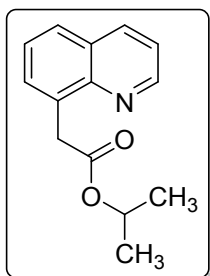

**Isopropyl 2-(quinolin-8-yl)acetate 3ah.** Yellow liquid; yield 67% (31 mg);  $^1\text{H}$  NMR (400 MHz,  $\text{CDCl}_3$ )  $\delta$  8.90 (q,  $J = 2.4$  Hz, 1H), 8.14 (dd,  $J = 8.4$  Hz, 6.4 Hz, 1H), 7.76 (d,  $J = 8.0$  Hz, 1H), 7.64 (d,  $J = 6.8$  Hz, 1H), 7.50 (t,  $J = 8.0$  Hz, 1H), 7.39 (q,  $J = 4.4$  Hz, 1H), 5.11-5.01

(m, 1H), 4.24 (s, 2H), 1.24 (s, 3H), 1.22 (s, 3H);  $^{13}\text{C}$  NMR (100 MHz,  $\text{CDCl}_3$ )  $\delta$  171.9, 149.6, 146.8, 136.2, 133.9, 130.3, 128.4, 127.4, 126.3, 121.2, 68.1, 37.6, 21.9; FT-IR (neat) 2978, 2934, 1725, 1499, 1372, 1241, 1104, 957, 794, 763  $\text{cm}^{-1}$ ; HRMS (ESI)  $m/z$   $[\text{M}+\text{H}]^+$  calcd for  $\text{C}_{14}\text{H}_{16}\text{NO}_2^+$ : 230.1176, found: 230.1181.

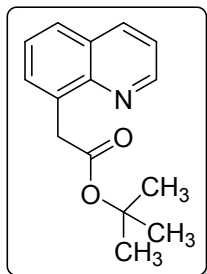

**tert-Butyl 2-(quinolin-8-yl)acetate 3ai.** Yellow liquid; yield 62% (30 mg);  $^1\text{H}$  NMR (400 MHz,  $\text{CDCl}_3$ )  $\delta$  8.91 (q,  $J = 2.4$  Hz, 1H), 8.14 (dd,  $J = 8.0$  Hz, 6.4 Hz, 1H), 7.75 (d,  $J = 8.0$  Hz, 1H), 7.64 (d,  $J = 7.2$  Hz, 1H), 7.49 (t,  $J = 7.6$  Hz, 1H), 7.40 (q,  $J = 4.4$  Hz, 1H), 4.19 (s, 2H), 1.44 (s, 9H);  $^{13}\text{C}$  NMR (150 MHz,  $\text{CDCl}_3$ )  $\delta$  171.7, 149.6, 146.9, 136.3, 134.2, 130.3, 128.4, 127.3, 126.3, 121.2, 80.7, 38.5, 28.2; FT-IR (neat) 2977, 1731, 1499, 1392, 1345, 1367, 1256, 797  $\text{cm}^{-1}$ ; HRMS (ESI)  $m/z$   $[\text{M}+\text{H}]^+$  calcd for  $\text{C}_{15}\text{H}_{18}\text{NO}_2^+$ : 244.1332, found: 244.1329.

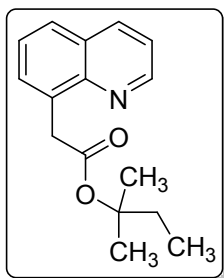

**tert-Pentyl 2-(quinolin-8-yl)acetate 3aj.** Yellow liquid; yield 64% (33 mg);  $^1\text{H}$  NMR (400 MHz,  $\text{CDCl}_3$ )  $\delta$  8.90 (q,  $J = 2.0$  Hz, 1H), 8.14 (dd,  $J = 8.4$  Hz, 6.8 Hz, 1H), 7.75 (d,  $J = 7.2$  Hz, 1H), 7.63 (d,  $J = 7.2$  Hz, 1H), 7.49 (t,  $J = 7.2$  Hz, 1H), 7.39 (q,  $J = 4.0$  Hz, 1H), 4.19 (s, 2H), 1.72 (q,  $J = 7.2$  Hz, 2H), 1.40 (s, 6H), 0.78 (t,  $J = 7.2$  Hz, 3H);  $^{13}\text{C}$  NMR (100 MHz,  $\text{CDCl}_3$ )  $\delta$  171.6, 149.6, 146.9, 136.2, 134.3, 130.3, 128.4, 127.2, 126.3, 121.2, 83.0, 38.5, 33.6, 25.6, 8.1; FT-IR (neat) 2973, 2925, 2855, 1726, 1499, 1196, 1142, 1060, 949, 829, 762  $\text{cm}^{-1}$ ; HRMS (ESI)  $m/z$   $[\text{M}+\text{H}]^+$  calcd for  $\text{C}_{16}\text{H}_{20}\text{NO}_2^+$ : 258.1489, found: 258.1486.

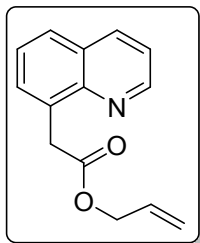

**Allyl 2-(quinolin-8-yl)acetate 3ak.** Yellow liquid; yield 63% (28 mg);  $^1\text{H}$  NMR (400 MHz,  $\text{CDCl}_3$ )  $\delta$  8.91 (q,  $J = 2.4$  Hz, 1H), 8.15 (dd,  $J = 8.0$  Hz, 6.8 Hz, 1H), 7.77 (d,  $J = 8.0$  Hz, 1H), 7.66 (d,  $J = 7.2$  Hz, 1H), 7.50 (t,  $J = 8.0$  Hz, 1H), 7.41 (q,  $J = 4.0$  Hz, 1H), 5.95-5.86 (m, 1H), 5.29-5.24 (m, 1H), 5.20-5.16 (m, 1H), 4.64-4.62 (m, 2H), 4.32 (s, 2H);  $^{13}\text{C}$  NMR (100 MHz,  $\text{CDCl}_3$ )  $\delta$  172.0, 149.8, 146.8, 136.3, 133.4, 132.4, 130.4, 128.4, 127.6, 126.3, 121.3, 118.0, 65.4, 37.2; FT-IR (neat) 2926, 2854, 1731, 1499, 1365, 1239, 1150, 987, 828, 794, 764  $\text{cm}^{-1}$ ; HRMS (ESI)  $m/z$   $[\text{M}+\text{H}]^+$  calcd for  $\text{C}_{14}\text{H}_{14}\text{NO}_2^+$ : 228.1019, found: 228.1020.

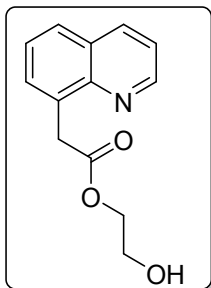

**2-Hydroxyethyl 2-(quinolin-8-yl)acetate 3al.** Yellow liquid; yield 68% (31 mg);  $^1\text{H}$  NMR (400 MHz,  $\text{CDCl}_3$ )  $\delta$  8.90 (q,  $J = 2.8$  Hz, 1H), 8.18 (dd,  $J = 8.4$  Hz, 6.4 Hz, 1H), 7.80 (d,  $J = 8.0$  Hz, 1H), 7.66 (d,  $J = 7.2$  Hz, 1H), 7.51 (t,  $J = 8.0$  Hz, 1H), 7.43 (q,  $J = 4.0$  Hz, 1H), 4.29 (t,  $J = 4.4$  Hz, 2H), 4.26 (s, 2H), 3.79 (t,  $J = 4.4$  Hz, 2H);  $^{13}\text{C}$  NMR (100 MHz,  $\text{CDCl}_3$ )  $\delta$  172.6, 149.9, 146.6, 136.7, 133.3, 130.8, 128.6, 127.8, 126.5, 121.4, 66.4, 61.2, 37.9; FT-IR (neat) 3406, 2924, 2854, 1732, 1500, 1259, 1173, 1077, 794, 765  $\text{cm}^{-1}$ ; HRMS (ESI)  $m/z$   $[\text{M}+\text{H}]^+$  calcd for  $\text{C}_{13}\text{H}_{14}\text{NO}_3^+$ : 232.0968, found: 232.0976.

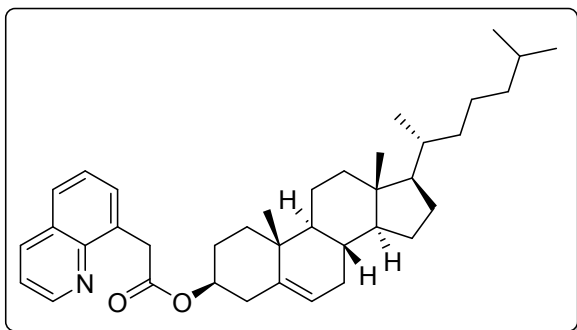

**(3S,8S,9S,10R,13R,14S,17R)-10,13-Dimethyl-17-((R)-6-methylheptan-2-yl)-2,3,4,7,8,9,10,11,12,13,14,15,16,17-tetradecahydro-1H-**

**cyclopenta[*a*]phenanthren-3-yl 2-(quinolin-8-yl)acetate 3an.** Colorless solid; mp 155-157 °C; yield 51% (57 mg); <sup>1</sup>H NMR (400 MHz, CDCl<sub>3</sub>) δ 8.91 (q, *J* = 2.4 Hz, 1H), 8.15 (dd, *J* = 8.4 Hz, 6.4 Hz, 1H), 7.76 (d, *J* = 6.8 Hz, 1H), 7.65 (d, *J* = 6.8 Hz, 1H), 7.50 (t, *J* = 8.0 Hz, 1H), 7.40 (q, *J* = 4.4 Hz, 1H), 5.35 (d, *J* = 5.2 Hz, 1H), 4.70-4.62 (m, 1H), 4.25 (s, 2H), 2.34-2.30 (m, 2H), 2.04-1.97 (m, 2H), 1.92-1.77 (m, 3H), 1.60-1.57 (m, 4H), 1.54-1.51 (m, 2H), 1.47-1.41 (m, 4H), 1.33-1.32 (m, 2H), 1.25 (s, 1H), 1.15-1.03 (m, 7H), 0.99 (s, 4H), 0.91 (d, *J* = 4.8 Hz, 3H), 0.86 (dd, *J* = 6.8 Hz, 4.8 Hz, 6H), 0.66 (s, 3H); <sup>13</sup>C NMR (100 MHz, CDCl<sub>3</sub>) δ 171.8, 149.6, 146.9, 139.9, 136.2, 133.9, 130.3, 128.4, 127.4, 126.3, 122.6, 121.2, 74.4, 56.8, 56.2, 50.1, 42.4, 39.8, 39.6, 38.1, 37.6, 37.1, 36.7, 36.3, 35.9, 32.05, 32.00, 28.3, 28.1, 27.8, 24.4, 23.9, 22.9, 22.7, 21.1, 19.4, 18.8, 12.0; FT-IR (neat) 2933, 2867, 2852, 1732, 1499, 1260, 1172, 1028, 796, 764, 703 cm<sup>-1</sup>; HRMS (ESI) *m/z* [M+H]<sup>+</sup> calcd for C<sub>38</sub>H<sub>54</sub>NO<sub>2</sub><sup>+</sup>: 556.4149, found: 556.4149.

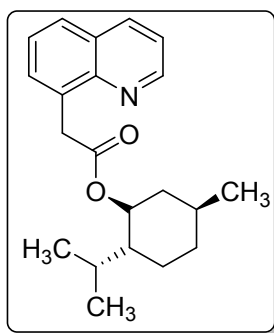

**(1R,2S,5S)-2-Isopropyl-5-methylcyclohexyl 2-(quinolin-8-yl)acetate**

**3ao.** Yellow solid; mp 85-87 °C; yield 40% (26 mg); <sup>1</sup>H NMR (400 MHz, CDCl<sub>3</sub>) δ 8.88 (q, *J* = 2.8 Hz, 1H), 8.17 (dd, *J* = 8.0 Hz, 6.4 Hz, 1H), 7.76 (d, *J* = 8.0 Hz, 1H), 7.64 (d, *J* = 6.8 Hz, 1H), 7.49 (t, *J* = 8.0 Hz, 1H), 7.40 (q, *J* = 4.0 Hz, 1H), 4.72-4.65 (m, 1H), 4.23 (s, 2H), 1.66-1.59 (m, 3H), 1.34-1.25 (m, 3H), 0.97 (q, *J* = 6.0 Hz, 1H), 0.91 (t, *J* = 6.0 Hz, 2H), 0.88 (d, *J* = 6.8 Hz, 3H), 0.79 (d, *J* = 6.8 Hz, 3H), 0.67 (d, *J* = 7.2 Hz, 3H); <sup>13</sup>C NMR (100 MHz, CDCl<sub>3</sub>) δ 172.0, 149.6, 146.9, 136.2, 134.0, 130.2, 128.4, 127.3, 126.3, 121.2, 74.6, 47.1, 40.9, 38.0, 34.4, 31.5, 26.0, 23.5, 22.1, 20.8, 16.4; FT-IR (neat) 2953, 2925, 2868, 1729, 1499, 1368, 1259, 1173, 985, 811, 795 cm<sup>-1</sup>; HRMS (ESI) *m/z* [M+H]<sup>+</sup> calcd for C<sub>21</sub>H<sub>28</sub>NO<sub>3</sub><sup>+</sup>: 326.2115, found: 326.2116.

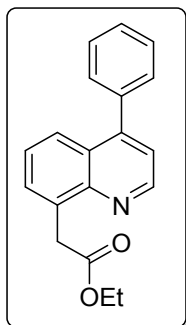

**Ethyl 2-(4-phenylquinolin-8-yl)acetate 3ba.** Yellow liquid; yield 58% (34 mg);  $^1\text{H}$  NMR (400 MHz,  $\text{CDCl}_3$ )  $\delta$  8.39 (d,  $J = 4.4$  Hz, 1H), 7.86 (d,  $J = 7.6$  Hz, 1H), 7.65 (d,  $J = 6.8$  Hz, 1H), 7.52-7.47 (m, 6H), 7.33 (d,  $J = 4.4$  Hz, 1H), 4.31 (s, 2H), 4.22 (q,  $J = 7.2$  Hz, 2H), 1.28 (t,  $J = 7.2$  Hz, 3H);  $^{13}\text{C}$  NMR (150 MHz,  $\text{CDCl}_3$ )  $\delta$  172.4, 149.1, 148.6, 147.1, 138.2, 133.8, 130.2, 129.5, 128.5, 128.3, 126.8, 126.1, 125.5, 121.4, 60.7, 37.6, 14.2; FT-IR (neat) 2918, 2849, 1731, 1490, 1396, 1252, 1154, 1030, 853, 765  $\text{cm}^{-1}$ ; HRMS (ESI)  $m/z$   $[\text{M}+\text{H}]^+$  calcd for  $\text{C}_{19}\text{H}_{18}\text{NO}_2^+$ : 292.1332, found: 292.1334.

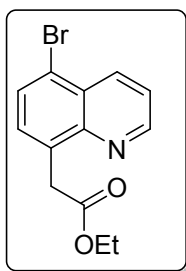

**Ethyl 2-(5-bromoquinolin-8-yl)acetate 3ca.** Yellow solid; mp 104-106  $^\circ\text{C}$ ; yield 66% (39 mg);  $^1\text{H}$  NMR (400 MHz,  $\text{CDCl}_3$ )  $\delta$  8.92 (q,  $J = 2.8$  Hz, 1H), 8.54 (dd,  $J = 8.4$  Hz, 6.8 Hz, 1H), 7.80 (d,  $J = 7.6$  Hz, 1H), 7.52-7.49 (m, 2H), 4.22 (s, 2H), 4.18 (q,  $J = 6.8$  Hz, 2H), 1.23 (t,  $J = 7.2$  Hz, 3H);  $^{13}\text{C}$  NMR (100 MHz,  $\text{CDCl}_3$ )  $\delta$  171.9, 150.3, 147.5, 135.8, 133.8, 130.6, 130.1, 127.8, 122.3, 121.2, 60.9, 37.2, 14.3; FT-IR (neat) 2978, 2988, 2937, 1718, 1568, 1496, 1343, 1179, 1028, 934, 847, 789  $\text{cm}^{-1}$ ; HRMS (ESI)  $m/z$   $[\text{M}+\text{H}]^+$  calcd for  $\text{C}_{13}\text{H}_{13}\text{BrNO}_2^+$ : 294.0124, found: 294.0131.

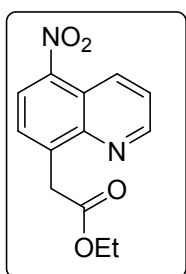

**Ethyl 2-(5-nitroquinolin-8-yl)acetate 3da.** Yellow solid; mp 66-67  $^\circ\text{C}$ ; yield 76% (39 mg);  $^1\text{H}$  NMR (400 MHz,  $\text{CDCl}_3$ )  $\delta$  9.04-9.00 (m, 2H), 8.36 (d,  $J = 7.6$  Hz, 1H), 7.75 (d,  $J =$

8.0 Hz, 1H), 7.65 (q,  $J = 4.4$  Hz, 1H), 4.33 (s, 2H), 4.19 (q,  $J = 7.2$  Hz, 2H), 1.24 (t,  $J = 6.8$  Hz, 3H);  $^{13}\text{C}$  NMR (100 MHz,  $\text{CDCl}_3$ )  $\delta$  171.1, 150.7, 146.6, 144.9, 141.7, 132.3, 128.6, 124.4, 124.0, 121.3, 61.2, 37.9, 14.3; FT-IR (neat) 2930, 2854, 1734, 1521, 1336, 1275, 1176, 1028, 815, 764  $\text{cm}^{-1}$ ; HRMS (ESI)  $m/z$   $[\text{M}+\text{H}]^+$  calcd for  $\text{C}_{13}\text{H}_{13}\text{N}_2\text{O}_4^+$ : 261.0870, found: 261.0882.

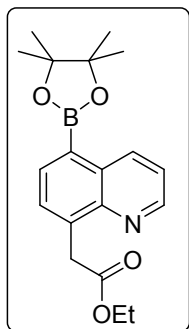

**Ethyl 2-(5-(4,4,5,5-tetramethyl-1,3,2-dioxaborolan-2-yl)quinolin-8-yl)acetate**

**3ea.** Yellow liquid; yield 60% (41 mg);  $^1\text{H}$  NMR (400 MHz,  $\text{CDCl}_3$ )  $\delta$  9.11 (dd,  $J = 8.4$  Hz, 2.8 Hz, 1H), 8.89 (q,  $J = 2.4$  Hz, 1H), 8.09 (d,  $J = 7.2$  Hz, 1H), 7.63 (d,  $J = 6.8$  Hz, 1H), 7.43 (q,  $J = 4.4$  Hz, 1H), 4.28 (s, 2H), 4.16 (q,  $J = 7.2$  Hz, 2H), 1.41 (s, 12H), 1.21 (t,  $J = 7.2$  Hz, 3H);  $^{13}\text{C}$  NMR (100 MHz,  $\text{CDCl}_3$ )  $\delta$  172.2, 149.2, 146.7, 137.2, 137.0, 135.9, 132.2, 130.4, 129.6, 121.4, 84.0, 60.8, 37.8, 25.1, 14.3; FT-IR (neat) 2979, 2927, 2854, 1733, 1502, 1368, 1259, 1111, 1029, 976, 856, 795  $\text{cm}^{-1}$ ; HRMS (ESI)  $m/z$   $[\text{M}+\text{H}]^+$  calcd for  $\text{C}_{19}\text{H}_{25}\text{BNO}_4^+$ : 342.1871, found: 342.1886.

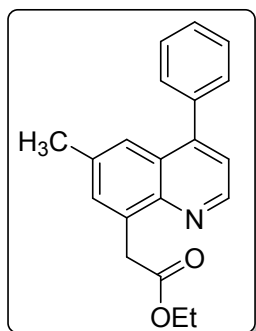

**Ethyl 2-(6-methyl-4-phenylquinolin-8-yl)acetate 3fa.** Yellow liquid; yield

70% (43 mg);  $^1\text{H}$  NMR (400 MHz,  $\text{CDCl}_3$ )  $\delta$  8.86 (d,  $J = 4.4$  Hz, 1H), 7.59 (s, 1H), 7.55-7.47 (m, 6H), 7.28 (d,  $J = 4.4$  Hz, 1H), 4.27 (s, 2H), 4.22 (q,  $J = 6.4$  Hz, 2H), 2.44 (s, 3H), 1.28 (t,  $J = 7.2$  Hz, 3H);  $^{13}\text{C}$  NMR (100 MHz,  $\text{CDCl}_3$ )  $\delta$  172.6, 148.3, 147.9, 145.8, 138.6, 136.0, 133.5, 132.6, 129.6, 128.6, 128.3, 126.9, 124.3, 121.6, 60.8, 37.7, 21.9, 14.3; FT-IR (neat) 2980, 2919, 2849, 1731, 1491, 1366, 1253, 1160, 1031, 867, 764  $\text{cm}^{-1}$ ; HRMS (ESI)  $m/z$   $[\text{M}+\text{H}]^+$  calcd for  $\text{C}_{20}\text{H}_{20}\text{NO}_2^+$ : 306.1489, found: 306.1486.

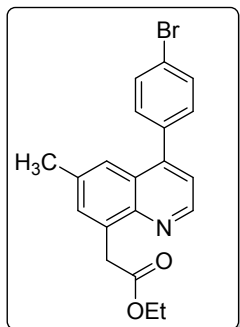

**Ethyl 2-(4-(4-bromophenyl)-6-methylquinolin-8-yl)acetate 3ga.** Yellow liquid; yield 72% (55 mg);  $^1\text{H NMR}$  (600 MHz,  $\text{CDCl}_3$ )  $\delta$  8.85 (d,  $J = 4.2$  Hz, 1H), 7.66 (d,  $J = 8.4$  Hz, 2H), 7.51 (d,  $J = 13.2$  Hz, 2H), 7.35 (d,  $J = 7.8$  Hz, 2H), 7.24 (d,  $J = 4.2$  Hz, 1H), 4.26 (s, 2H), 4.21 (q,  $J = 7.2$  Hz, 2H), 2.44 (s, 3H), 1.28 (t,  $J = 7.2$  Hz, 3H);  $^{13}\text{C NMR}$  (150 MHz,  $\text{CDCl}_3$ )  $\delta$  172.5, 148.2, 146.6, 145.8, 137.4, 136.4, 133.7, 132.8, 131.8, 131.2, 126.6, 123.9, 122.7, 121.4, 60.9, 37.7, 21.9, 14.3; FT-IR (neat) 2978, 2924, 2865, 1731, 1485, 1387, 1160, 1009, 827, 764, 749  $\text{cm}^{-1}$ ; HRMS (ESI)  $m/z$   $[\text{M}+\text{H}]^+$  calcd for  $\text{C}_{20}\text{H}_{19}\text{BrNO}_2^+$ : 384.0594, found: 384.0595.

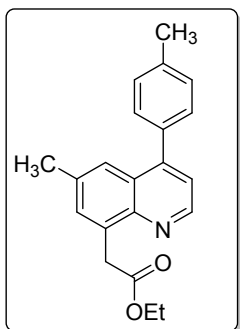

**Ethyl 2-(6-methyl-4-(*p*-tolyl)quinolin-8-yl)acetate 3ha.** Yellow liquid; yield 55% (35 mg);  $^1\text{H NMR}$  (600 MHz,  $\text{CDCl}_3$ )  $\delta$  8.84 (d,  $J = 4.4$  Hz, 1H), 7.62 (s, 1H), 7.48 (s, 1H), 7.39-7.32 (m, 4H), 7.27 (d,  $J = 4.4$  Hz, 1H), 4.26 (s, 2H), 4.22 (q,  $J = 7.2$  Hz, 2H), 2.47 (s, 3H), 2.44 (s, 3H), 1.28 (t,  $J = 7.2$  Hz, 3H);  $^{13}\text{C NMR}$  (100 MHz,  $\text{CDCl}_3$ )  $\delta$  172.6, 148.3, 148.0, 145.8, 138.2, 135.9, 135.6, 133.5, 132.5, 129.5, 129.3, 127.1, 124.4, 121.6, 60.8, 37.7, 21.9, 21.4, 14.3; FT-IR (neat) 2980, 29128, 2850, 1731, 1498, 1439, 1386, 1159, 1029, 908, 867, 817, 729  $\text{cm}^{-1}$ ; HRMS (ESI)  $m/z$   $[\text{M}+\text{H}]^+$  calcd for  $\text{C}_{21}\text{H}_{22}\text{NO}_2^+$ : 320.1645, found: 320.1659.

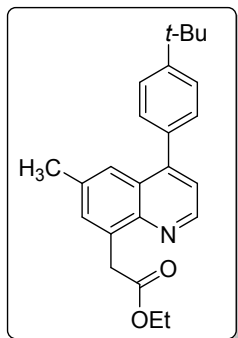

**Ethyl 2-(4-(4-(tert-butyl)phenyl)-6-methylquinolin-8-yl)acetate 3ia.**

Yellow liquid; yield 68% (49 mg);  $^1\text{H NMR}$  (400 MHz,  $\text{CDCl}_3$ )  $\delta$  8.77 (d,  $J = 4.4$  Hz, 1H), 7.59 (s, 1H), 7.48 (d,  $J = 8.4$  Hz, 2H), 7.41 (s, 1H), 7.36 (d,  $J = 8.4$  Hz, 2H), 7.19 (t,  $J = 4.4$  Hz, 1H), 4.19 (s, 2H), 4.15 (q,  $J = 7.2$  Hz, 2H), 2.38 (s, 3H), 1.34 (s, 9H), 1.21 (t,  $J = 7.2$  Hz, 3H);  $^{13}\text{C NMR}$  (150 MHz,  $\text{CDCl}_3$ )  $\delta$  172.7, 151.4, 148.3, 147.9, 145.8, 135.9, 135.6, 133.4, 132.6, 129.4, 127.0, 125.5, 124.5, 121.6, 60.8, 37.7, 34.8, 31.5, 21.9, 14.3; FT-IR (neat) 2961, 2906, 2867, 1733, 1498, 1365, 1254, 1160, 1031, 834, 750  $\text{cm}^{-1}$ ; HRMS (ESI)  $m/z$   $[\text{M}+\text{H}]^+$  calcd for  $\text{C}_{24}\text{H}_{28}\text{NO}_2^+$ : 362.2115, found: 362.2116.

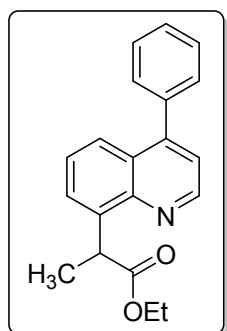

**Ethyl 2-(4-phenylquinolin-8-yl)propanoate 3ja.** Colorless liquid; yield 32%

(19 mg);  $^1\text{H NMR}$  (400 MHz,  $\text{CDCl}_3$ )  $\delta$  8.94 (d,  $J = 4.4$  Hz, 1H), 7.83 (dd,  $J = 8.4$  Hz, 2.4 Hz, 1H), 7.67 (dd,  $J = 6.8$  Hz, 1.2 Hz, 1H), 7.52-7.44 (m, 6H), 7.33 (d,  $J = 4.4$  Hz, 1H), 5.08 (q,  $J = 7.2$  Hz, 1H), 4.18 (q,  $J = 6.8$  Hz, 2H), 1.66 (d,  $J = 7.2$  Hz, 3H), 1.19 (t,  $J = 7.2$  Hz, 3H);  $^{13}\text{C NMR}$  (100 MHz,  $\text{CDCl}_3$ )  $\delta$  175.8, 149.0, 146.3, 140.4, 138.4, 129.7, 128.6, 128.4, 127.3, 127.0, 126.4, 125.1, 121.5, 60.7, 40.4, 18.5, 14.3; FT-IR (neat) 2977, 2922, 2850, 1730, 1490, 1395, 1189, 1096, 855, 767  $\text{cm}^{-1}$ ; HRMS (ESI)  $m/z$   $[\text{M}+\text{H}]^+$  calcd for  $\text{C}_{20}\text{H}_{20}\text{NO}_2^+$ : 306.1489, found: 306.1489.



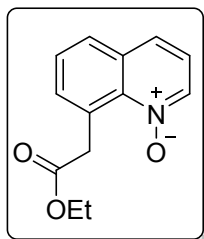

**8-(2-Ethoxy-2-oxoethyl)quinoline 1-oxide 4aa.** Brown solid; 109-110 °C; yield 81% (37 mg);  $^1\text{H}$  NMR (400 MHz,  $\text{CDCl}_3$ )  $\delta$  8.38 (d,  $J = 6.0$  Hz, 1H), 7.78 (d,  $J = 8.0$  Hz, 1H), 7.68 (d,  $J = 8.4$  Hz, 1H), 7.51 (t,  $J = 8.0$  Hz, 1H), 7.42 (d,  $J = 6.8$  Hz, 1H), 7.22 (q,  $J = 2.4$  Hz, 1H), 4.39 (s, 2H), 4.23 (q,  $J = 7.2$  Hz, 2H), 1.28 (t,  $J = 7.2$  Hz, 3H);  $^{13}\text{C}$  NMR (100 MHz,  $\text{CDCl}_3$ )  $\delta$  171.7, 149.7, 137.2, 134.7, 132.5, 129.4, 128.6, 128.2, 126.5, 121.1, 60.7, 43.5, 14.4; FT-IR (neat) 3415, 3070, 2983, 2905, 1730, 1575, 1370, 1301, 1228, 1180, 1024, 817, 762  $\text{cm}^{-1}$ ; HRMS (ESI)  $m/z$   $[\text{M}+\text{H}]^+$  calcd for  $\text{C}_{13}\text{H}_{14}\text{NO}_3^+$ : 232.0968, found: 232.0982.

## References

1. (a) X. Xu, Y. Yang, X. Zhang and W. Yi, *Org. Lett.*, 2018, **20**, 566; (b) S. Fukagawa, M. Kogima, T. Yoshino and S. Matsunaga, *Angew. Chem. Int. Ed.*, 2019, **58**, 18154; (c) S. H. Cho, J. Y. Kim, S. Y. Lee and S. Chang, *Angew. Chem. Int. Ed.*, 2009, **48**, 9127.
2. J. Zhao, P. Li, C. Xia and F. Li, *RSC Adv.* 2015, **5**, 32835.
3. S. Kim, S. Han, J. Park, S. Sharma, N. K. Mishra, H. Oh, J. H. Kwak and I. S. Kim, *Chem. Commun.*, 2017, **53**, 3006.

KT-172-1H

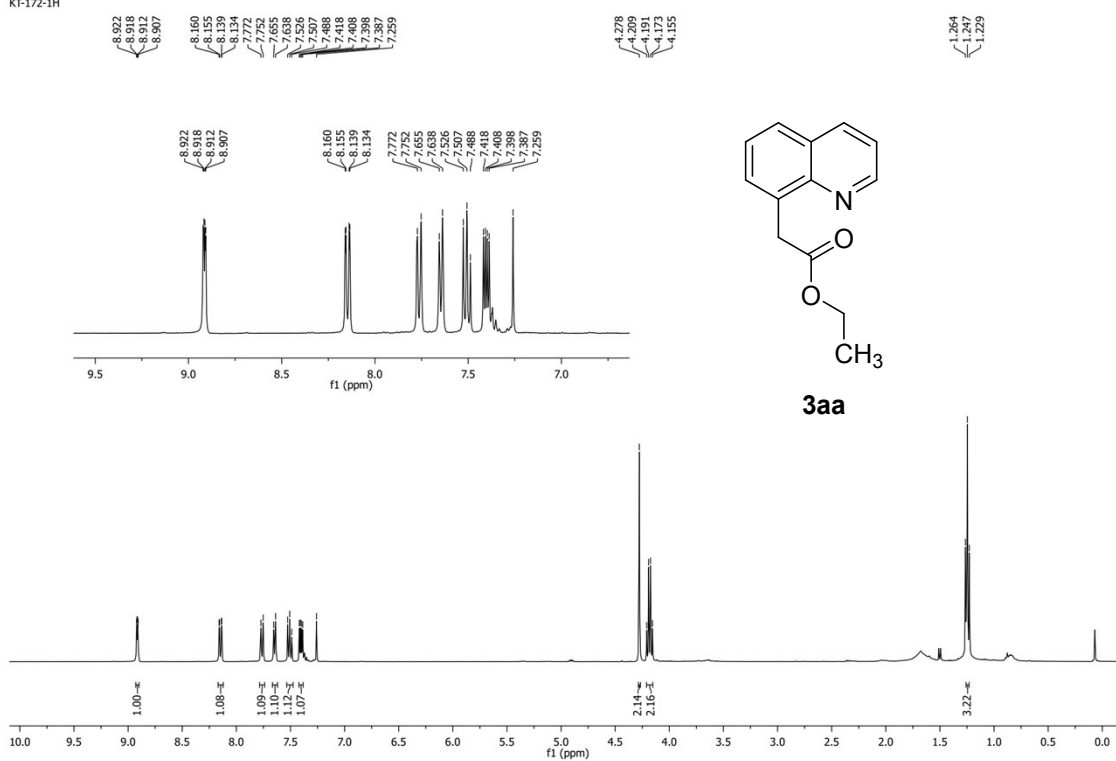

KT-172-13C

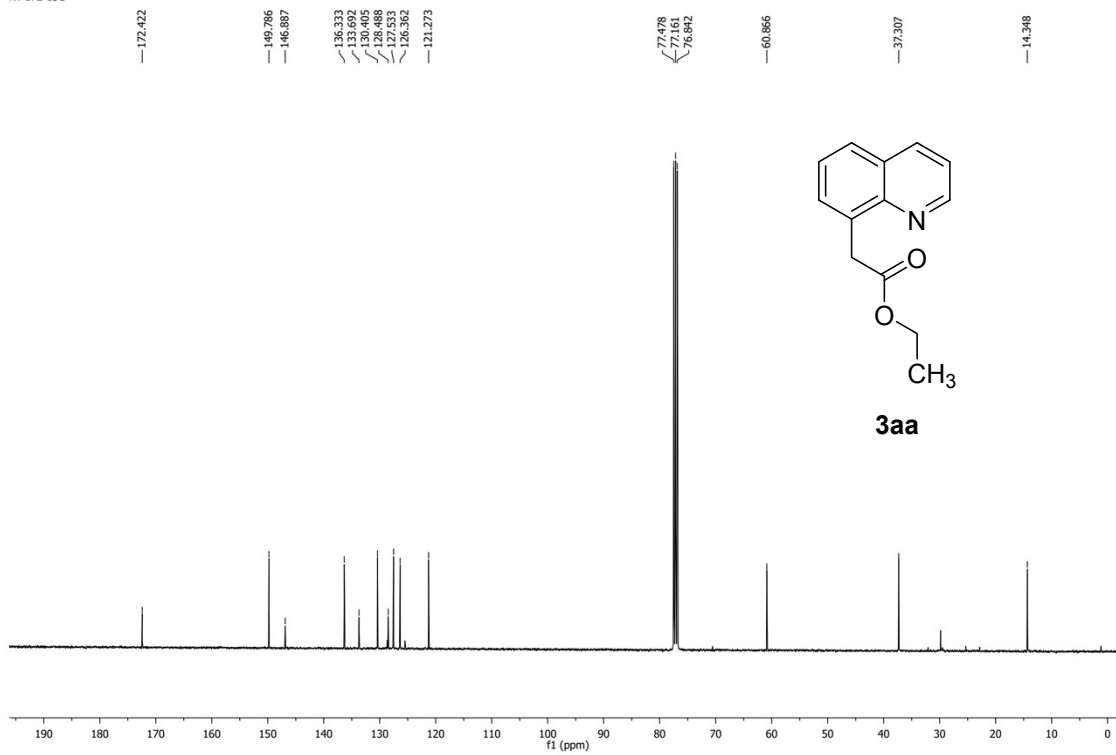

KT-171-1H

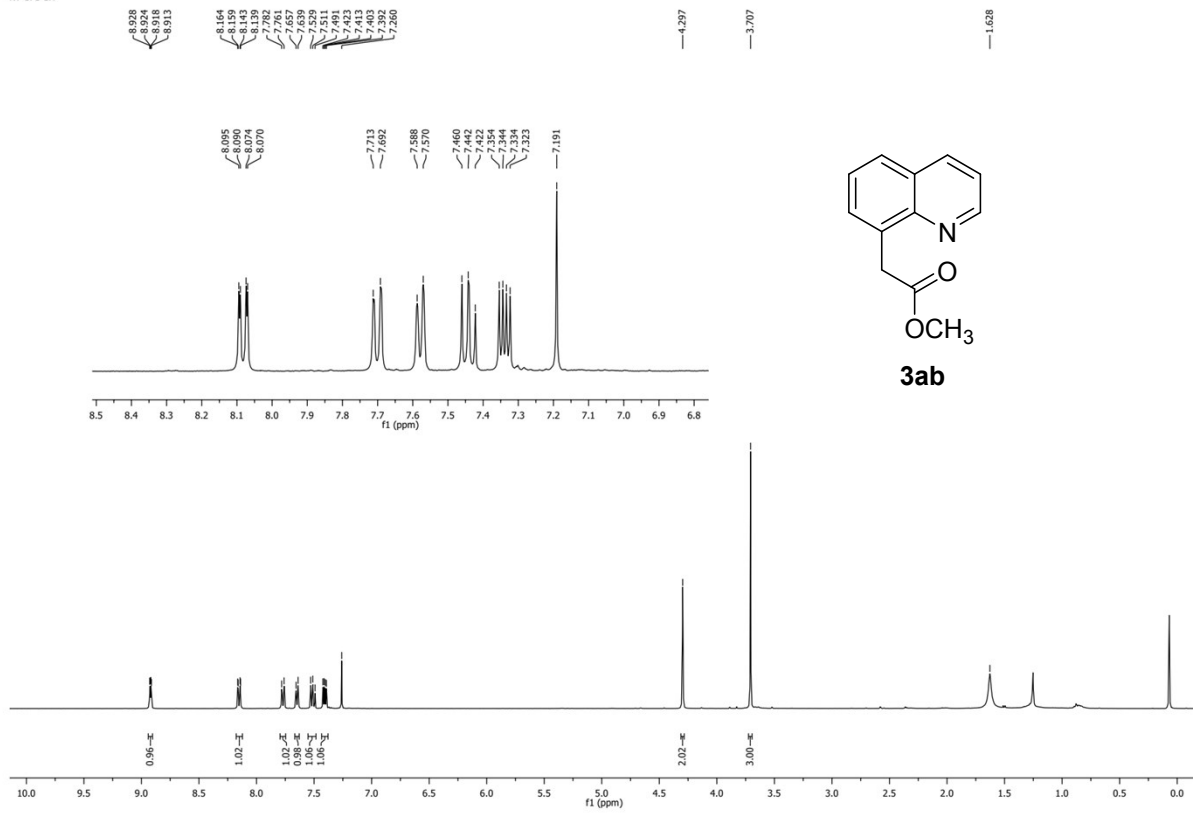

KT-171-13C

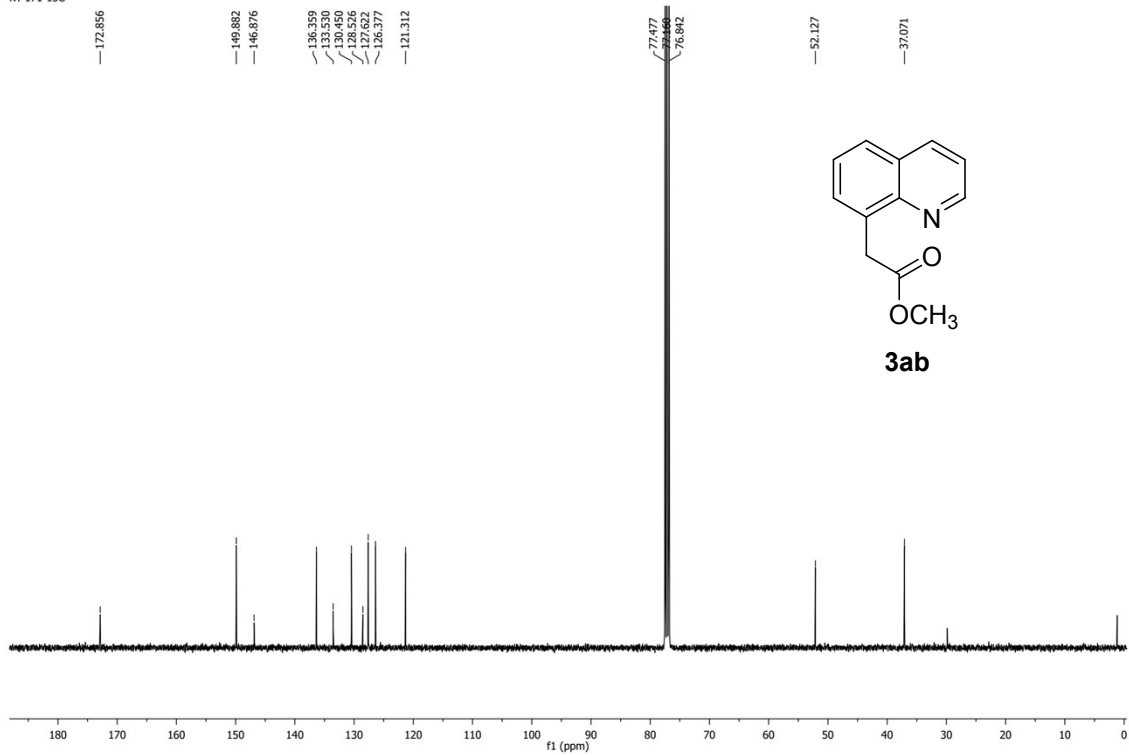

KT-176-1H

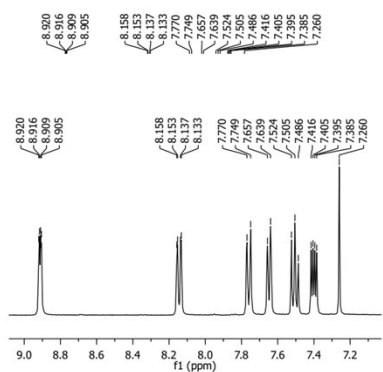

4.290  
4.094  
3.978  
1.001

1.669  
1.651  
1.633  
1.615  
1.598  
1.580  
0.877  
0.860

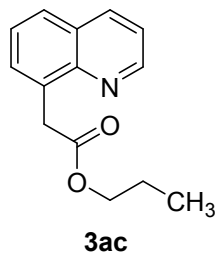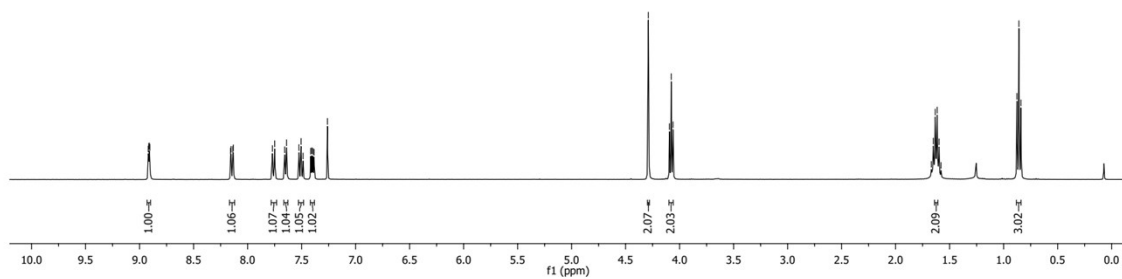

KT-176-13C

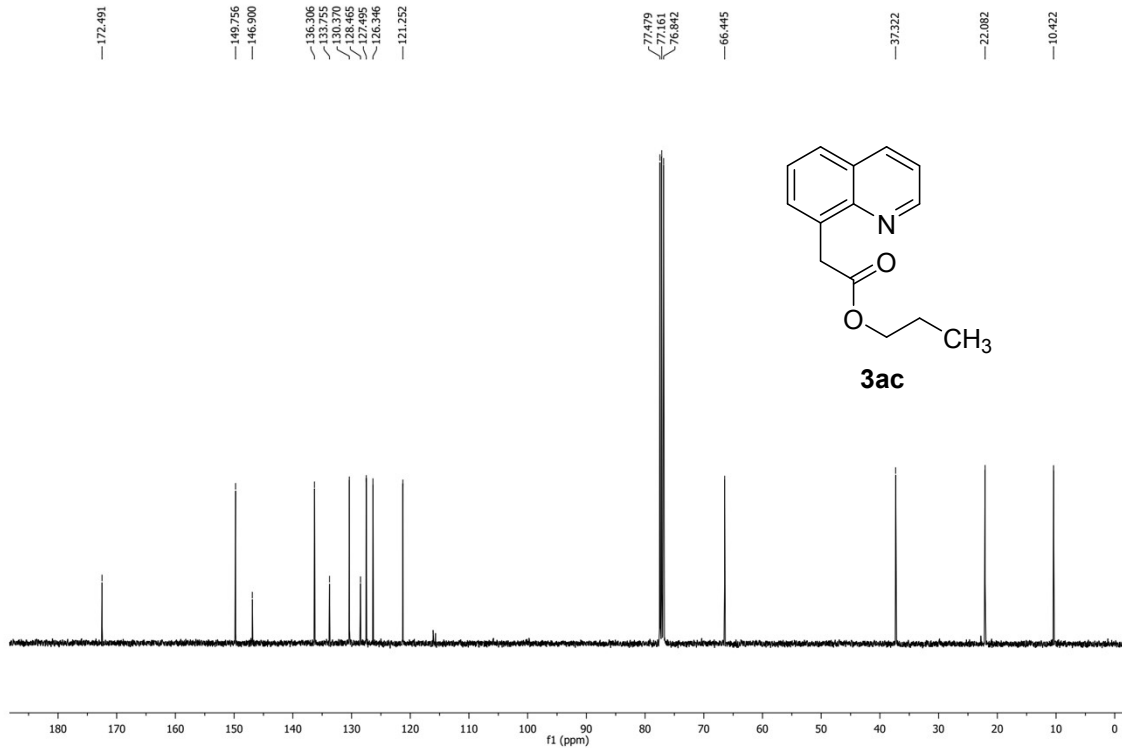

KT-175-1H

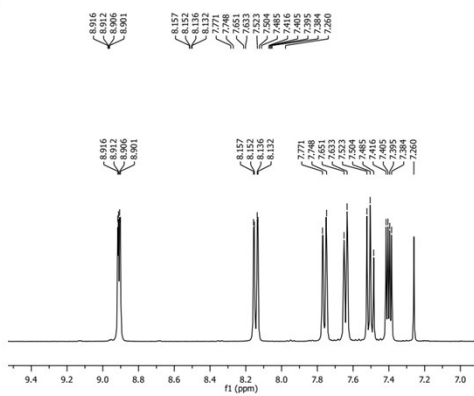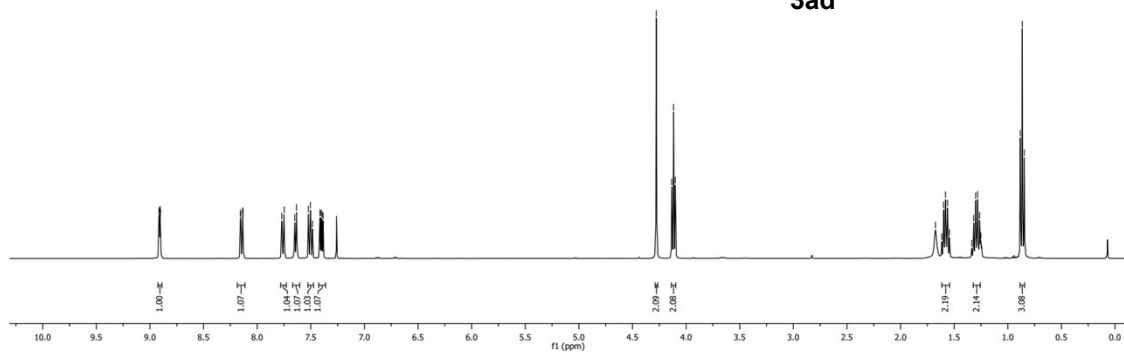

KT-175-13C

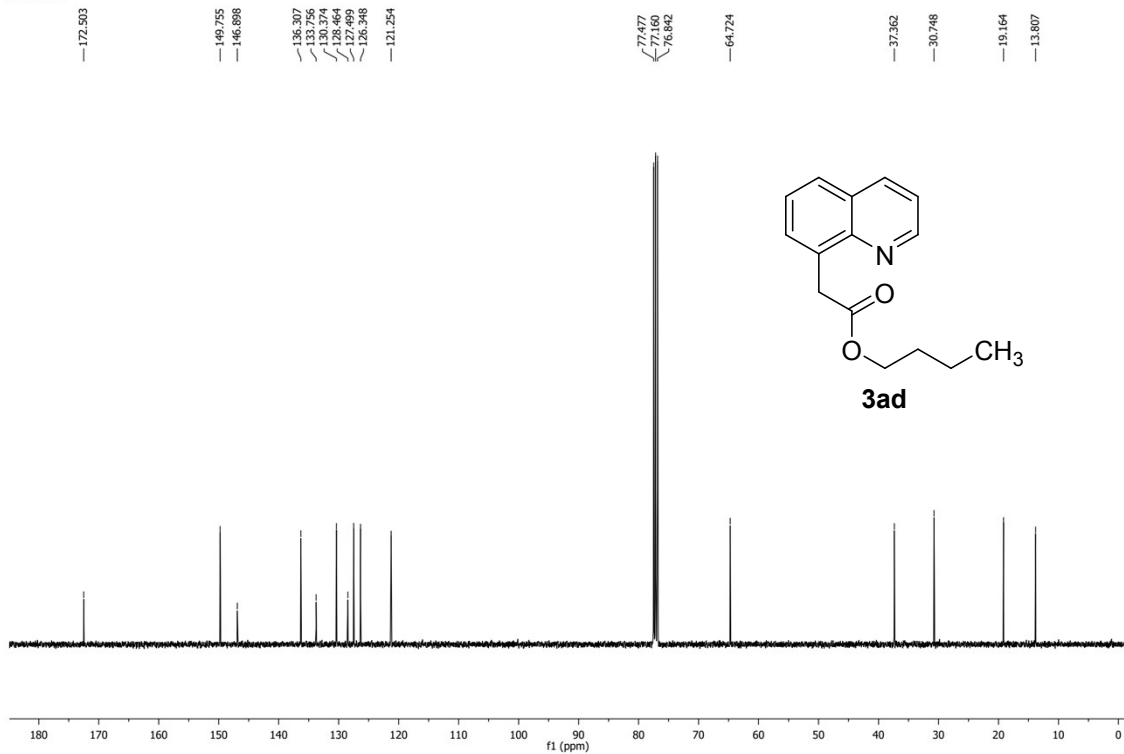

KT-177-1H

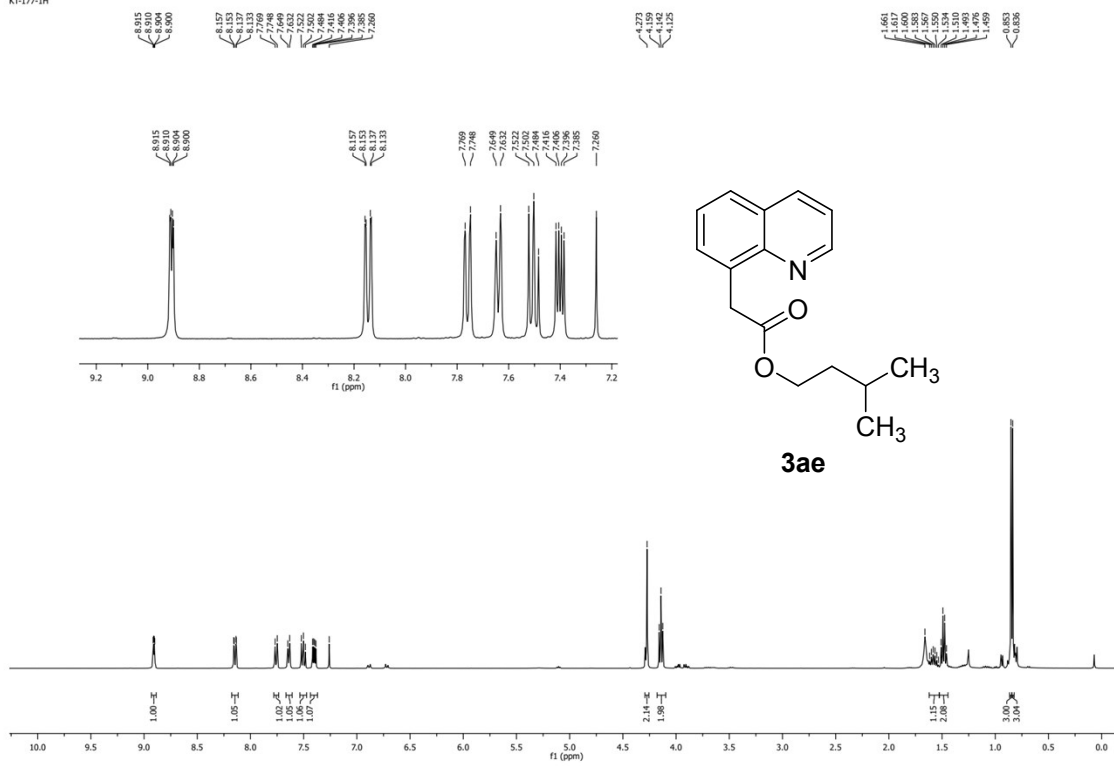

KT-177-13C

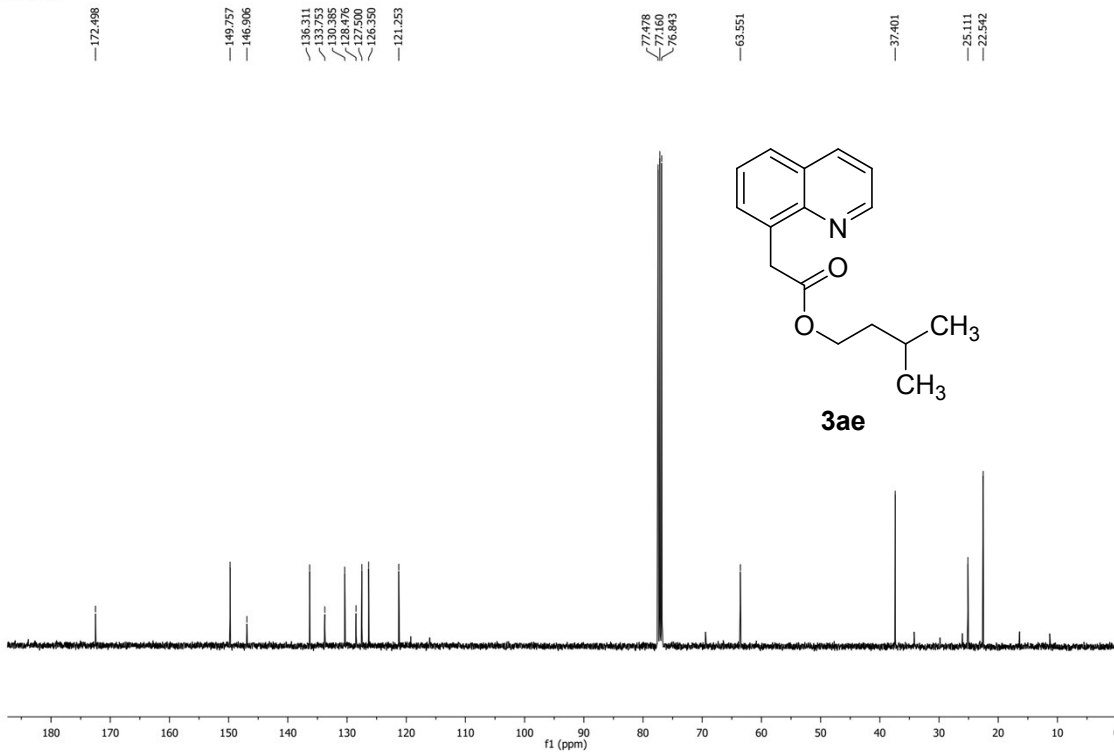

KT-185-1H

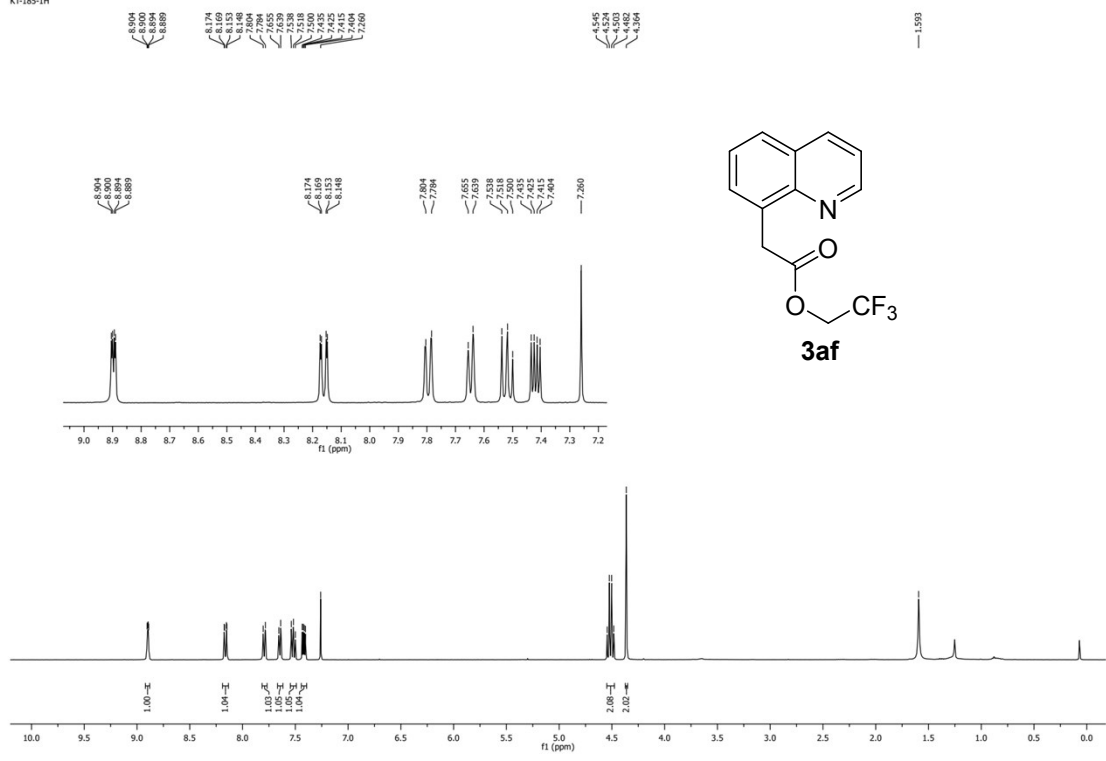

KT-185-13C

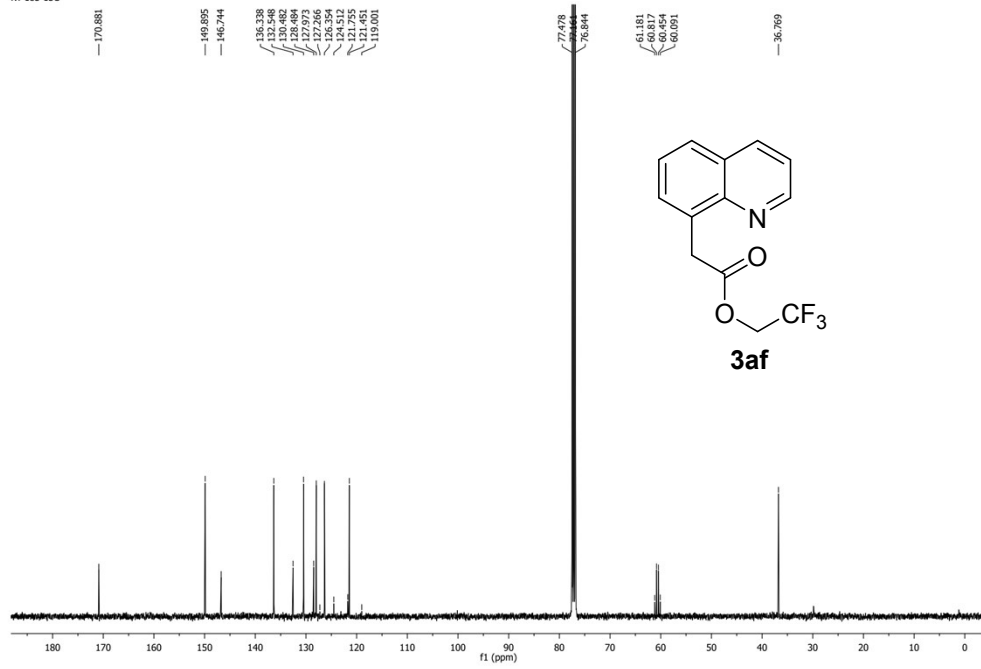

KT-185-19F

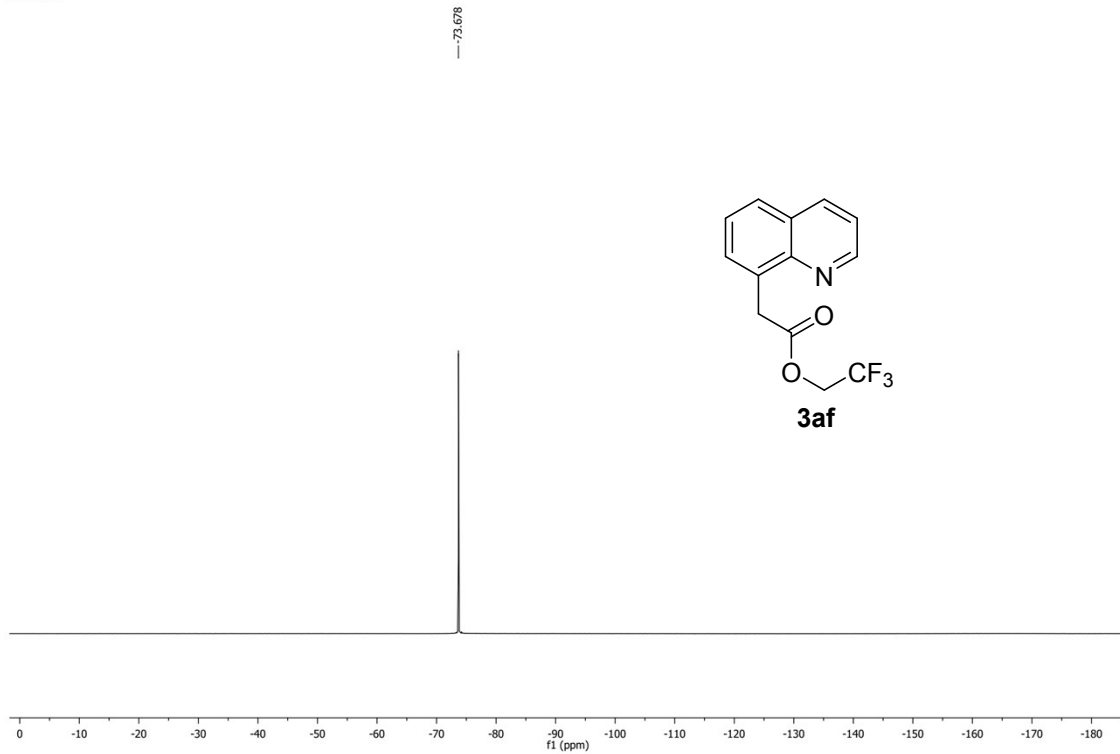



KT-180-1H

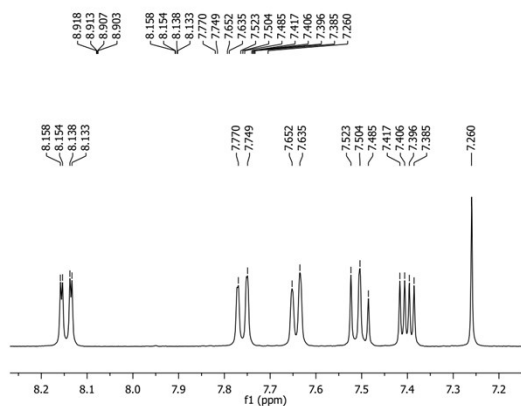

4.278  
4.118  
4.094

1.599  
1.564  
1.548  
1.314  
1.297  
1.274  
1.254  
1.250  
1.242  
1.218  
0.900  
0.885

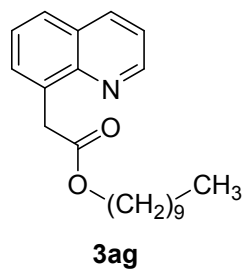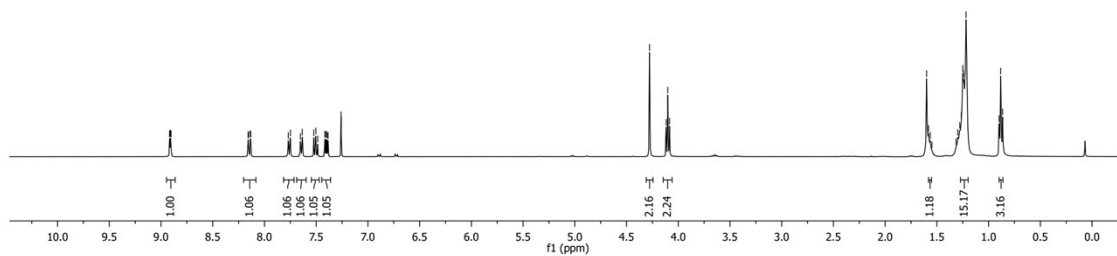

KT-180-13C

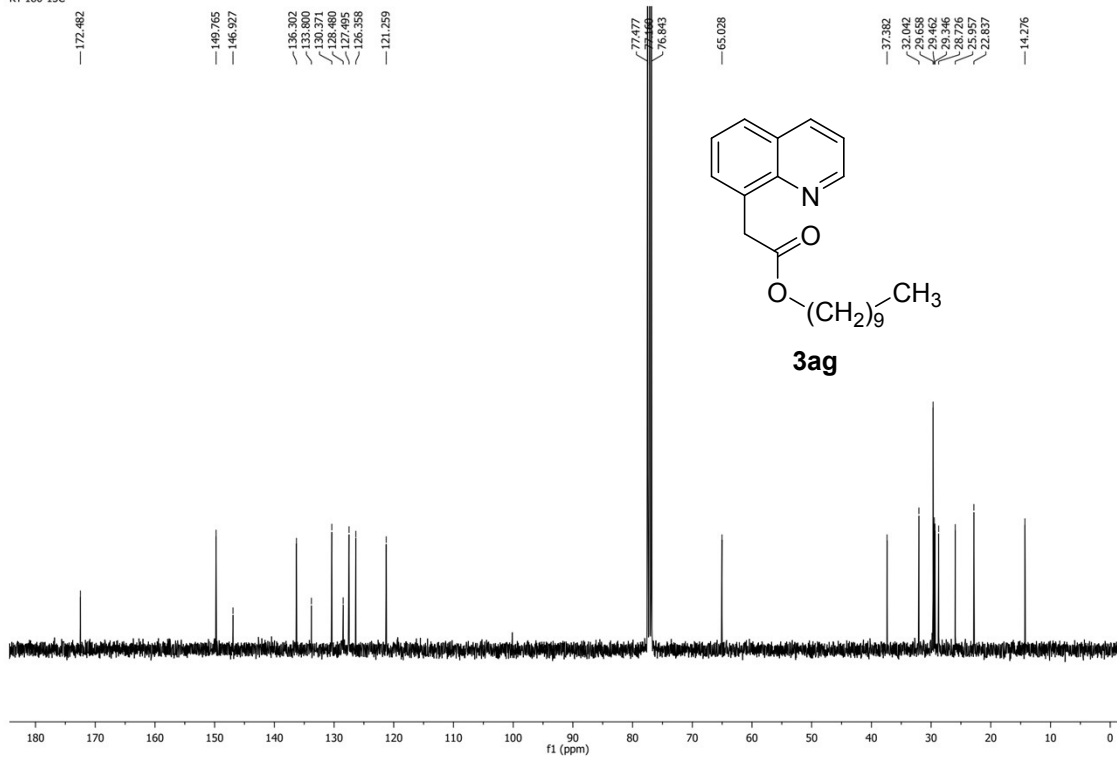

KT-173-1H

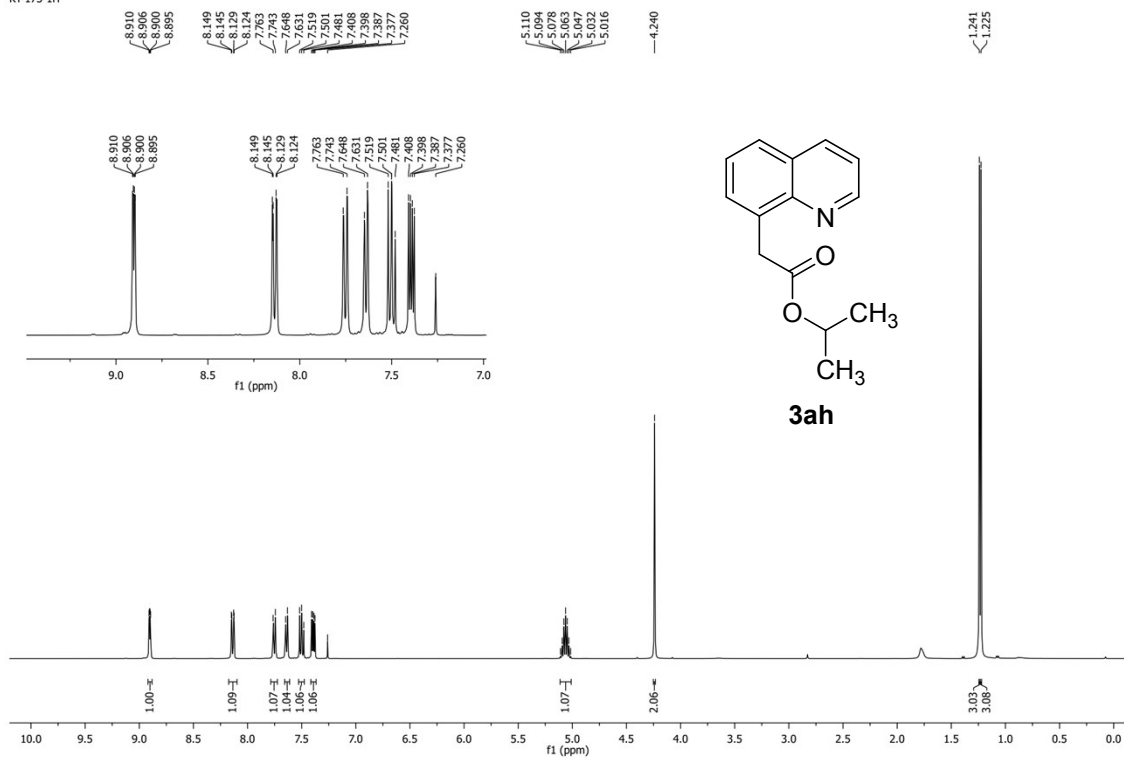

KT-173-13C

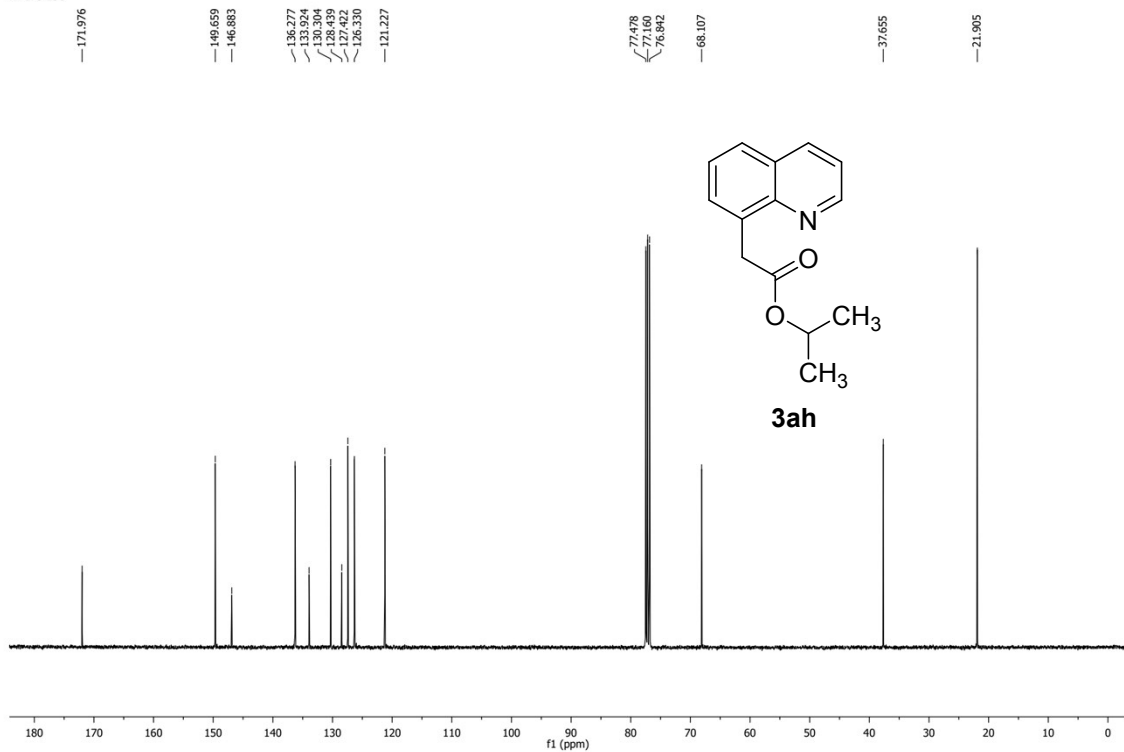

KT-174-1H

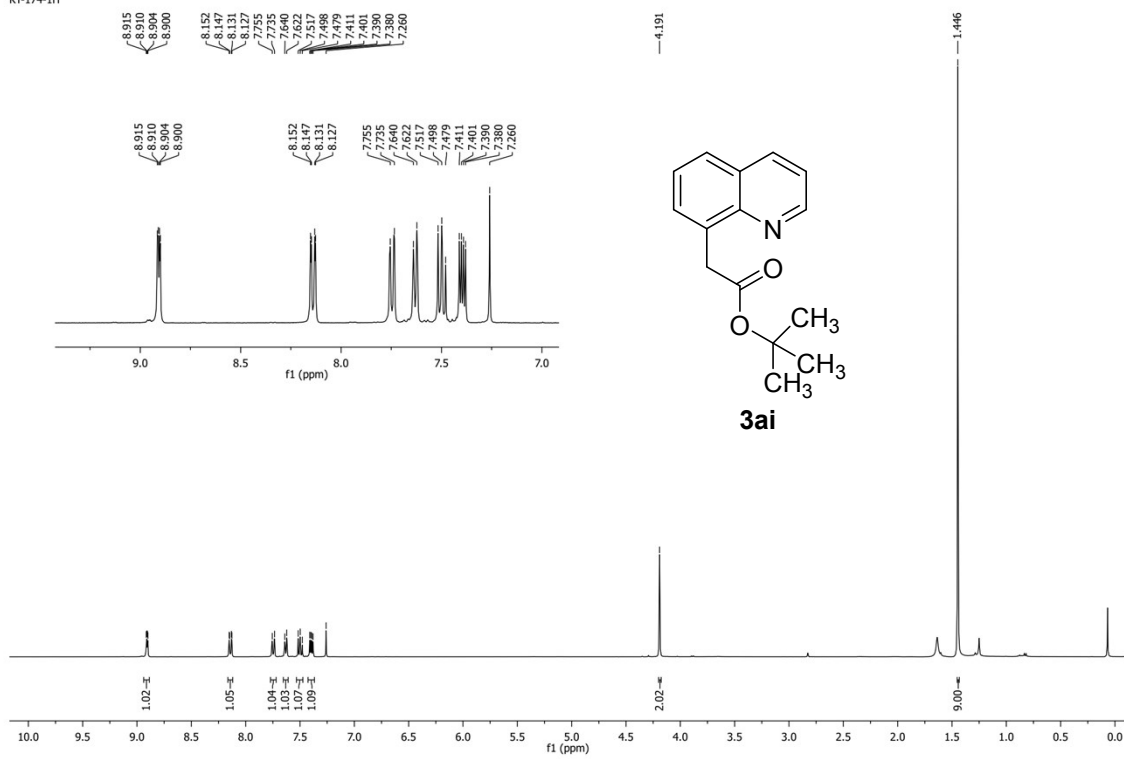

KT-174-13C

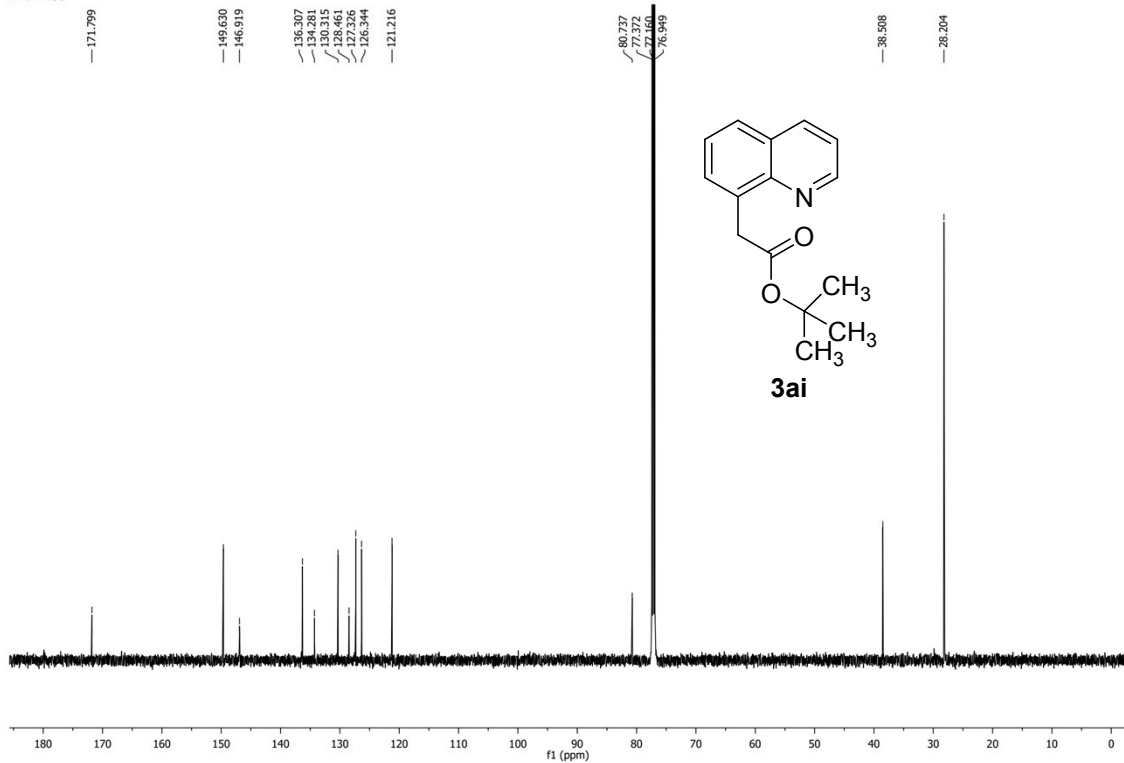

KT-182-1H

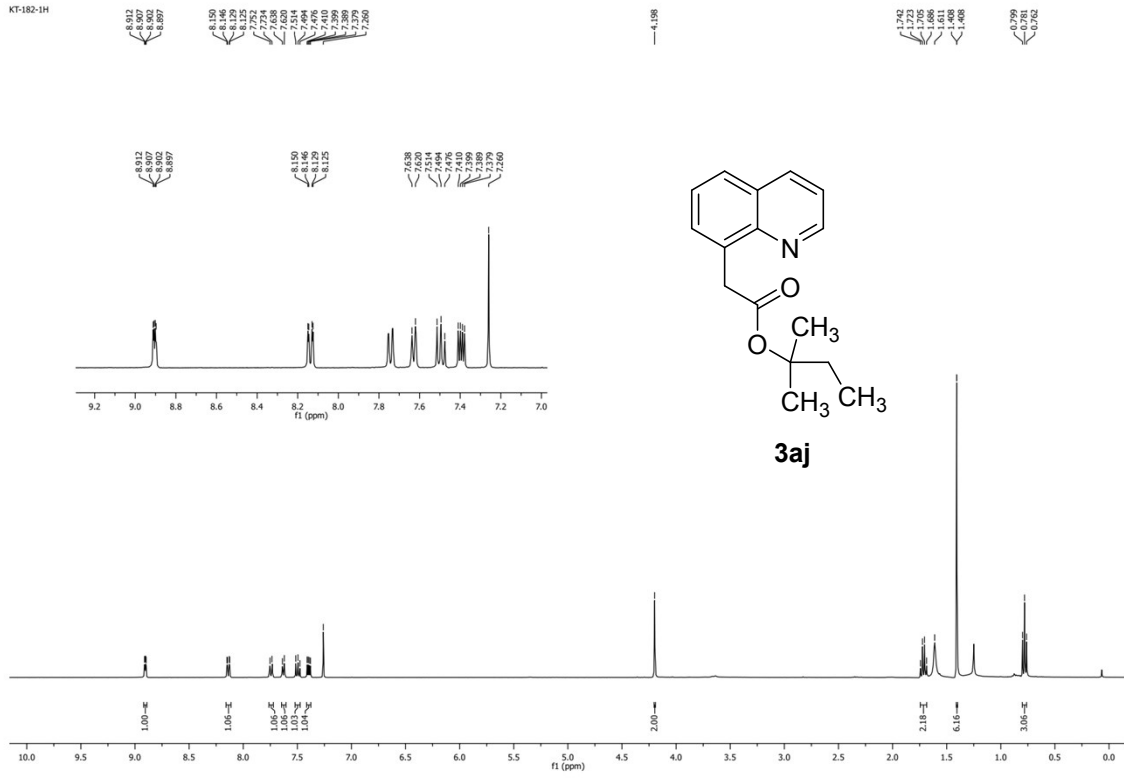

KT-182-13C

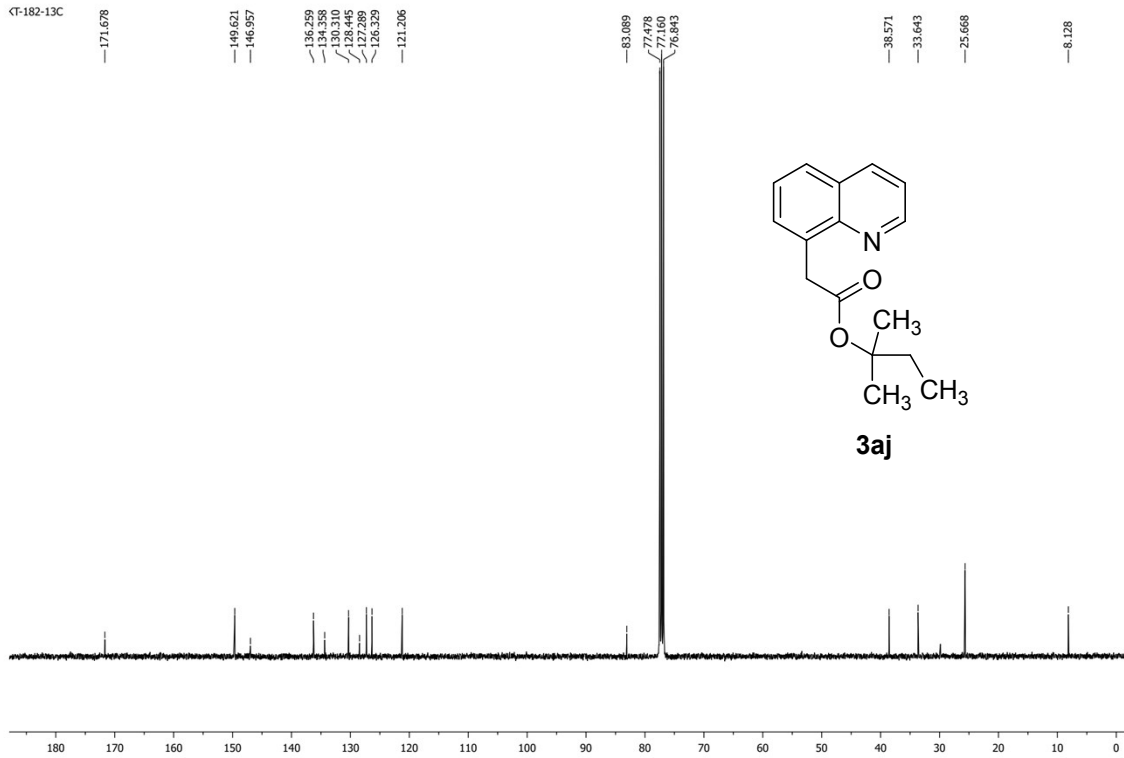

KT-198-1H

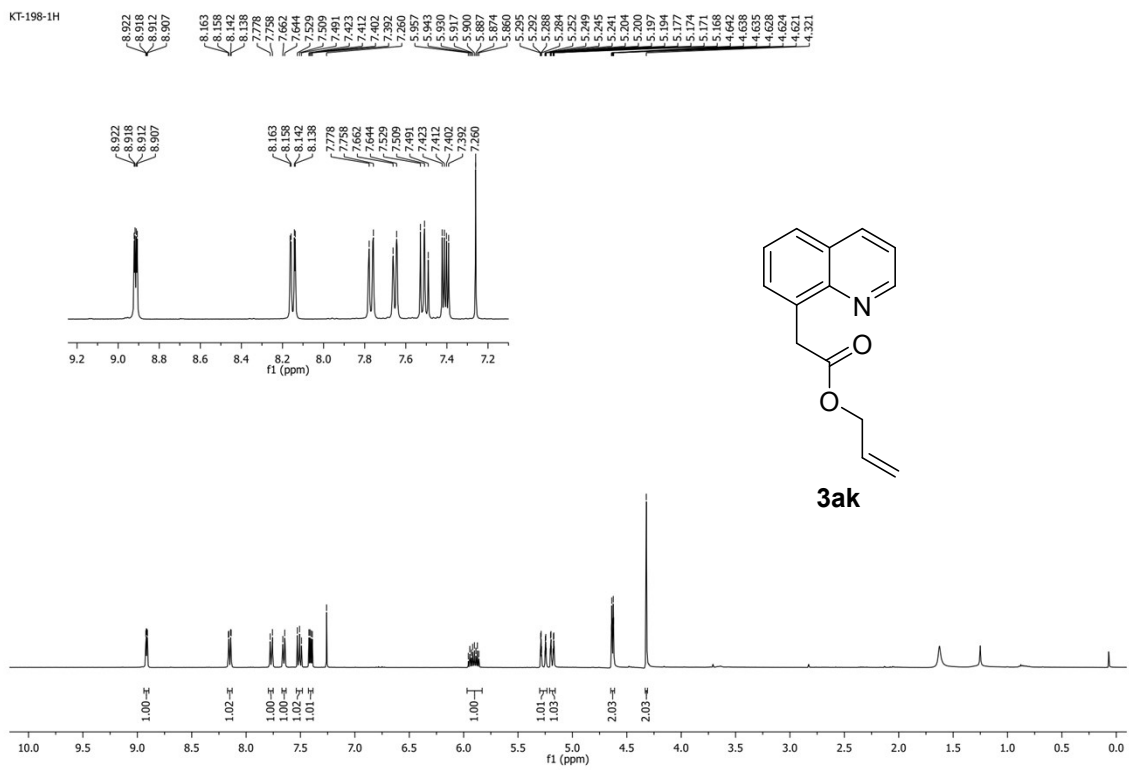

KT-198-13C

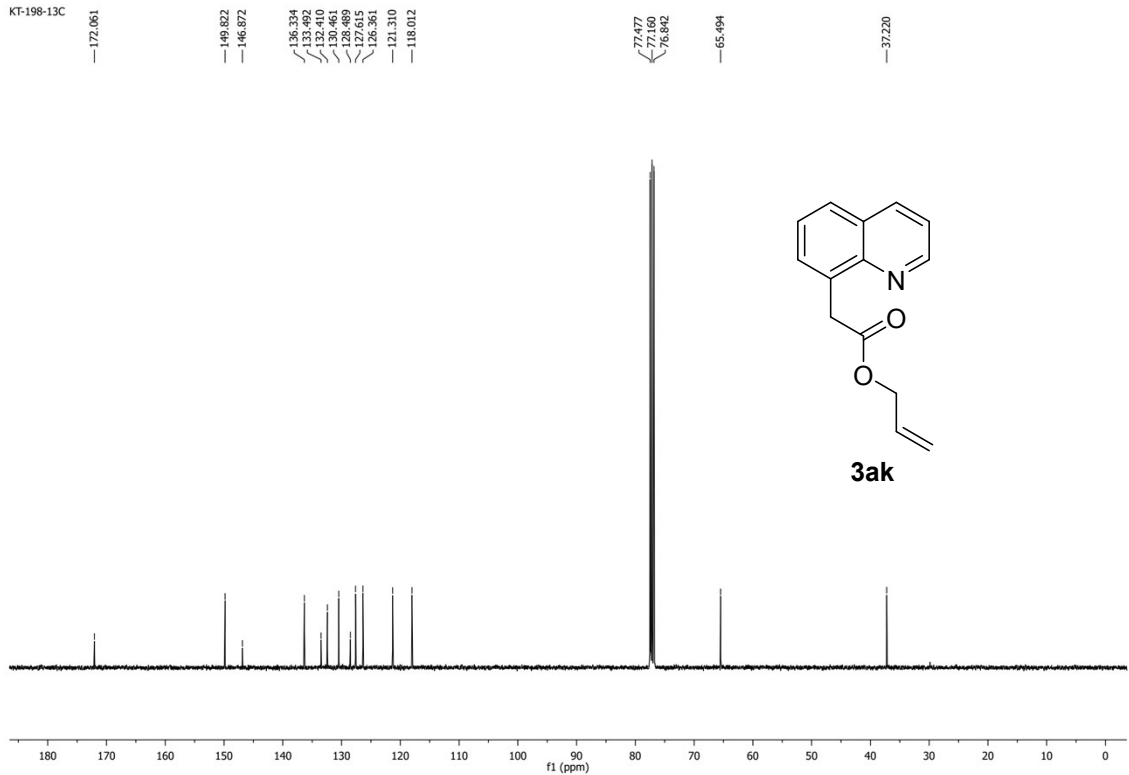

KT-191-1H

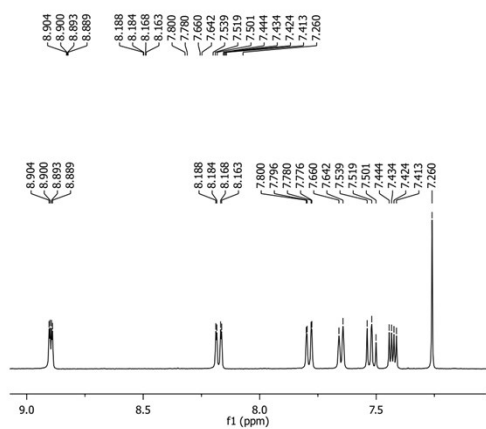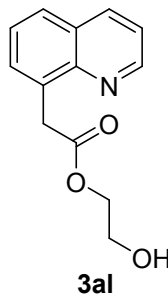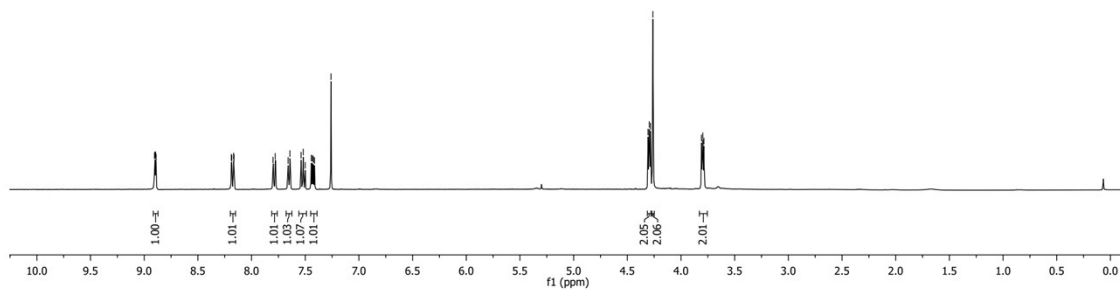

KT-191-13C

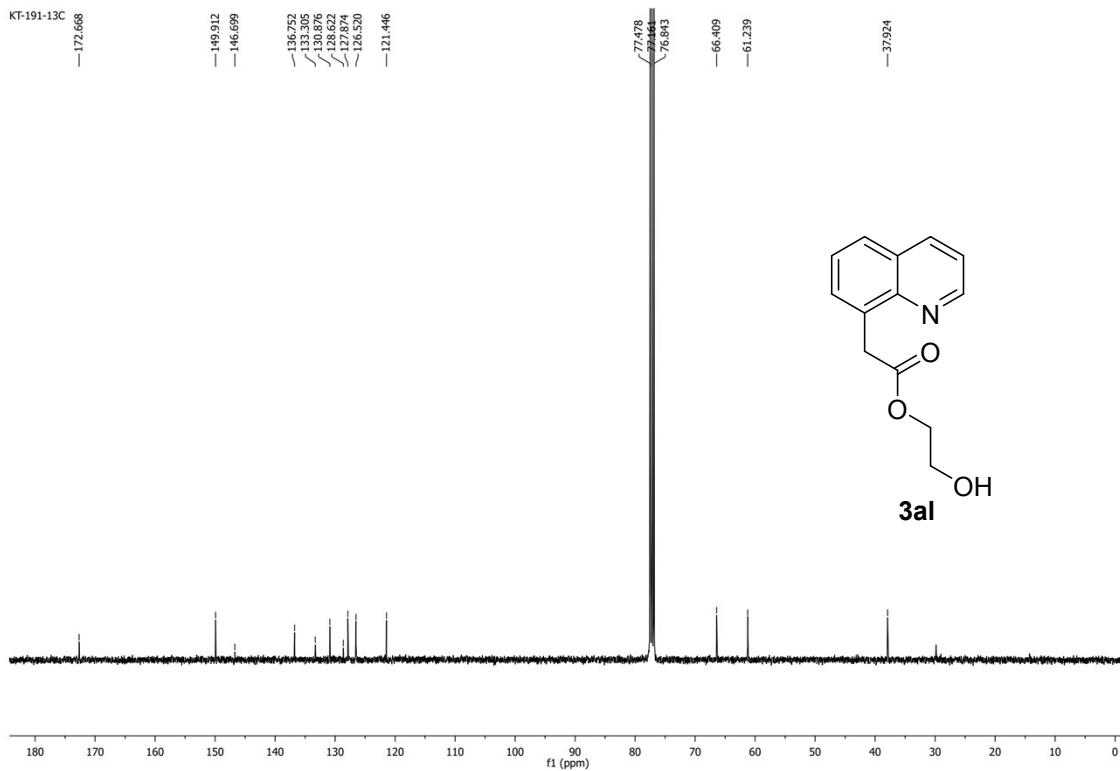

KT-179-1H

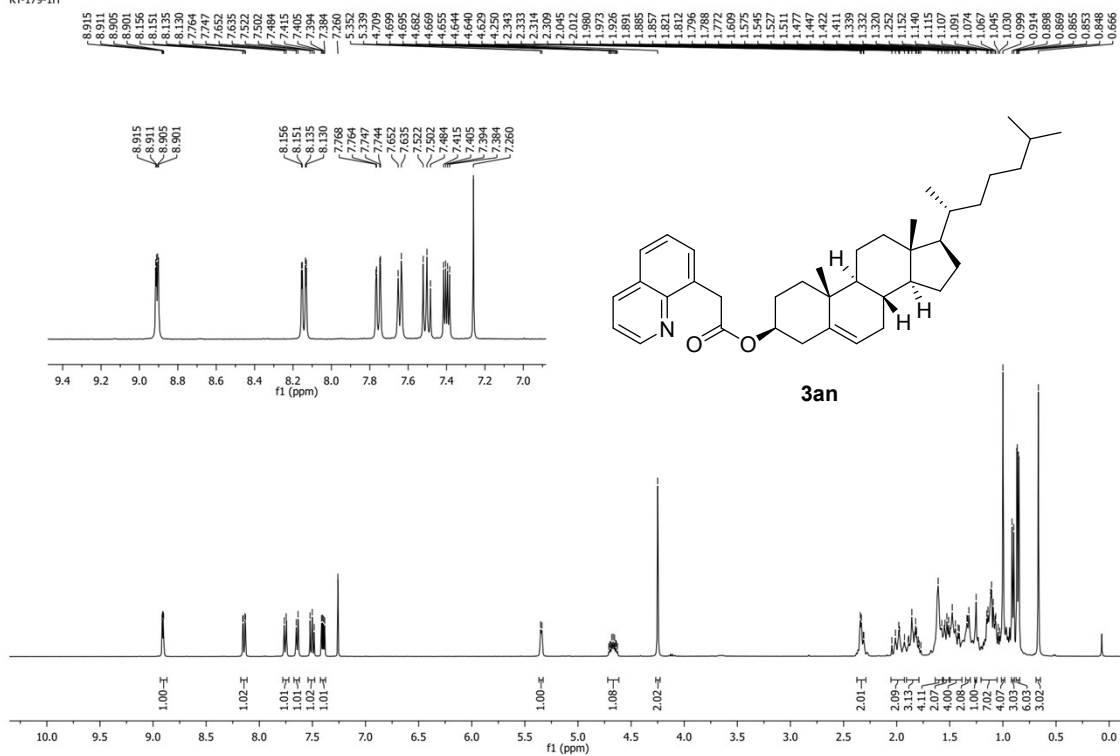

KT-179-13C

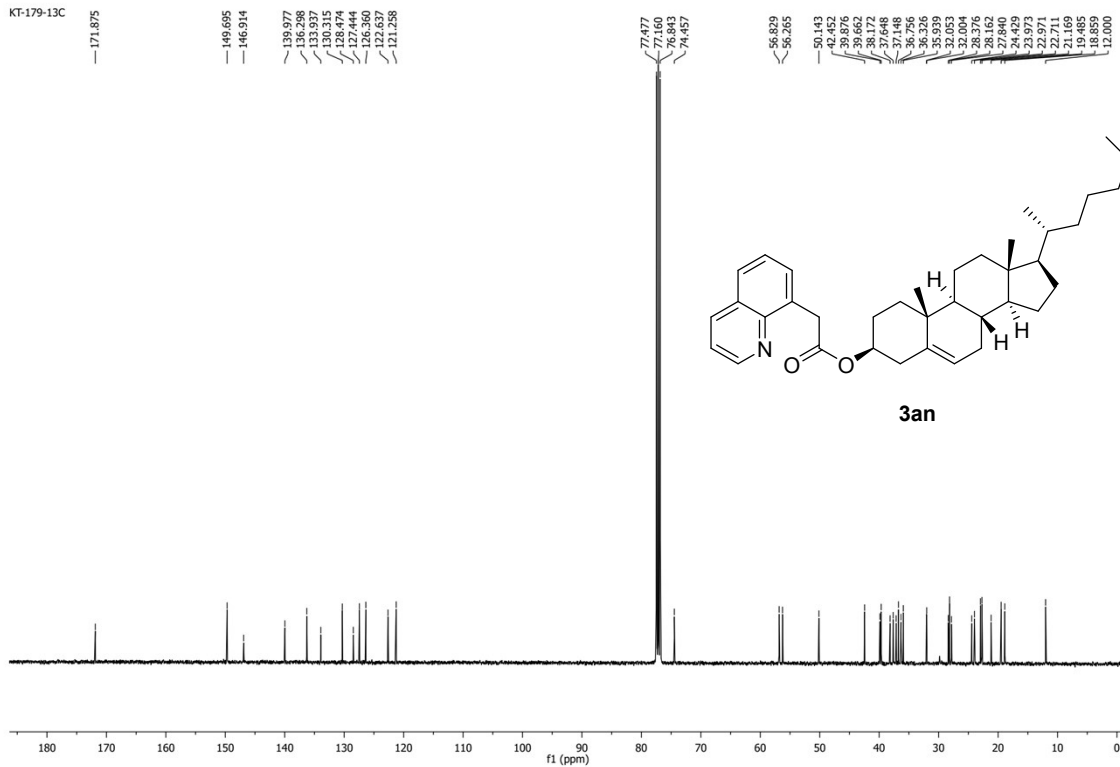

KT-184-1H

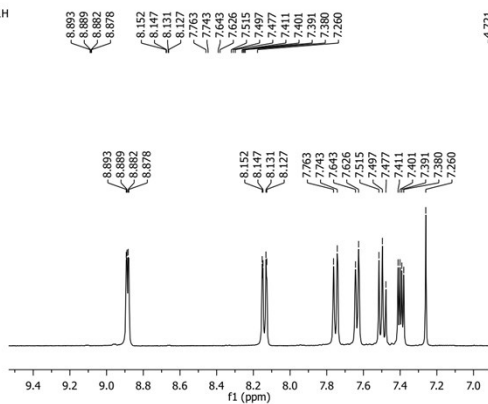

8.893  
8.889  
8.882  
8.878  
8.152  
8.147  
8.141  
8.127  
7.763  
7.743  
7.643  
7.636  
7.626  
7.497  
7.477  
7.411  
7.401  
7.391  
7.380  
7.260  
4.771  
4.770  
4.683  
4.682  
4.666  
4.655  
4.235

1.665  
1.652  
1.633  
1.626  
1.598  
1.591  
1.581  
1.340  
1.332  
1.325  
1.303  
1.300  
1.274  
1.250  
0.988  
0.978  
0.968  
0.950  
0.935  
0.918  
0.903  
0.889  
0.872  
0.778  
0.672  
0.654

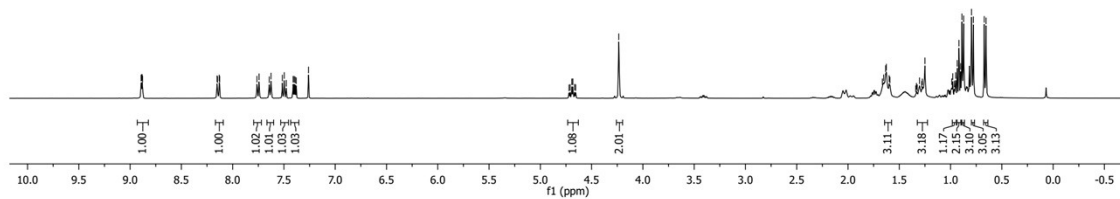

KT-184-13C

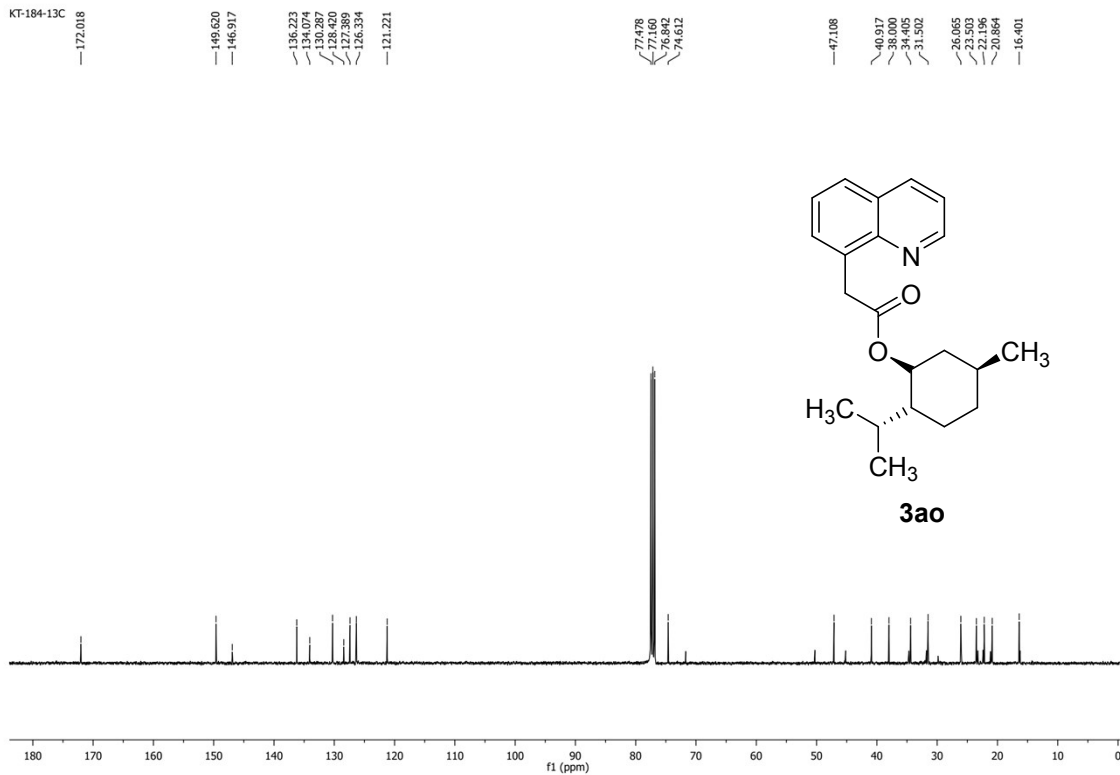

172.018

149.620  
146.917

136.223  
134.074  
130.287  
128.420  
127.599  
126.334  
121.221

77.478  
77.160  
76.642  
74.612

47.108

40.917  
38.000  
35.005  
31.902

26.065  
21.105  
20.105  
22.106  
20.864  
16.401



KT-217-N-1H

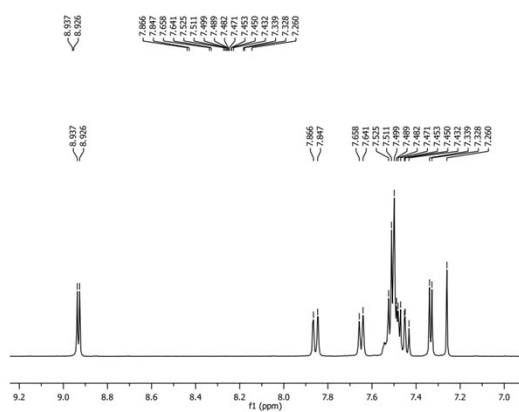

4.312  
4.329  
4.320  
4.185

1.615  
1.360  
1.264

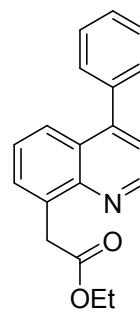

**3ba**

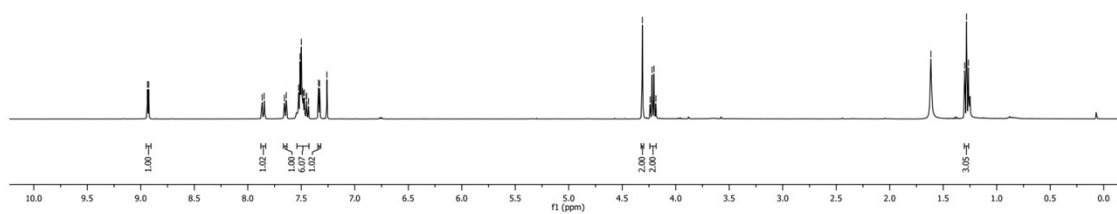

KT-217-N-13C

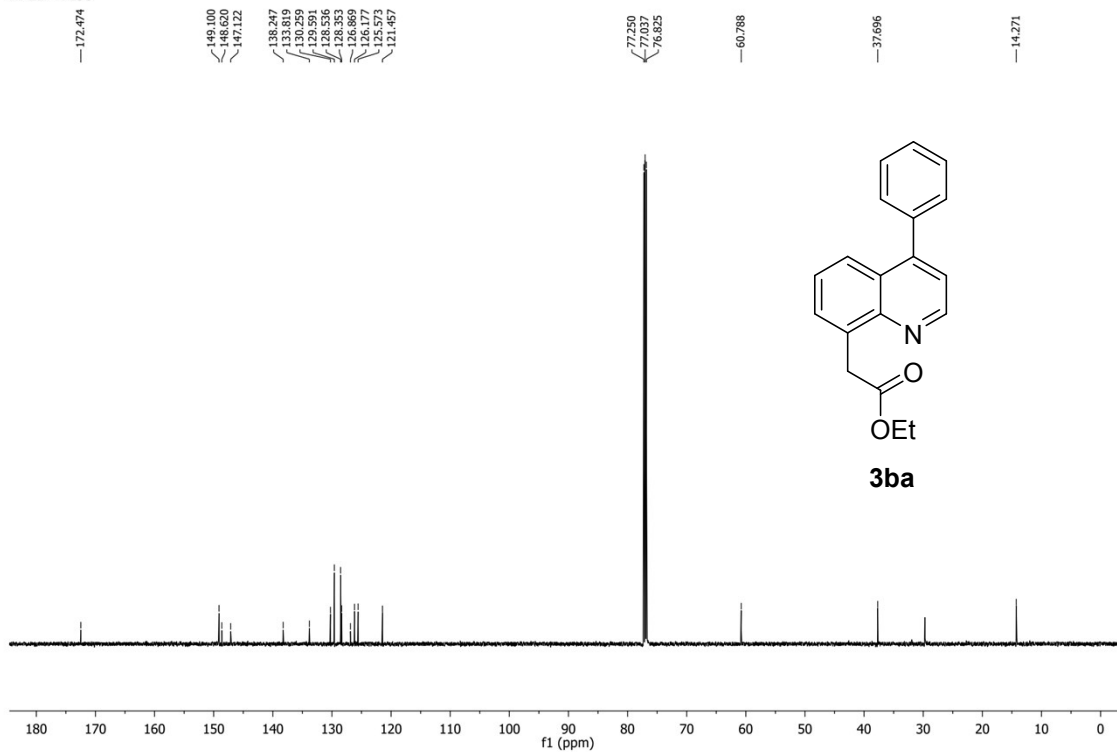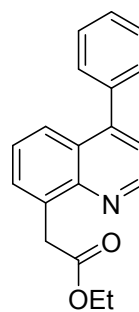

**3ba**

KT-196-1H

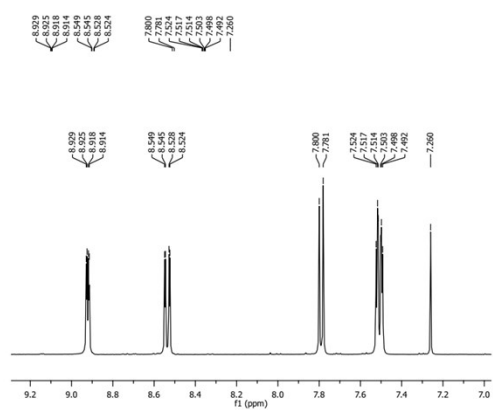

4.223  
4.181  
4.133  
4.115

1.633  
1.256  
1.239  
1.221

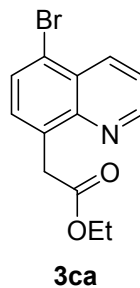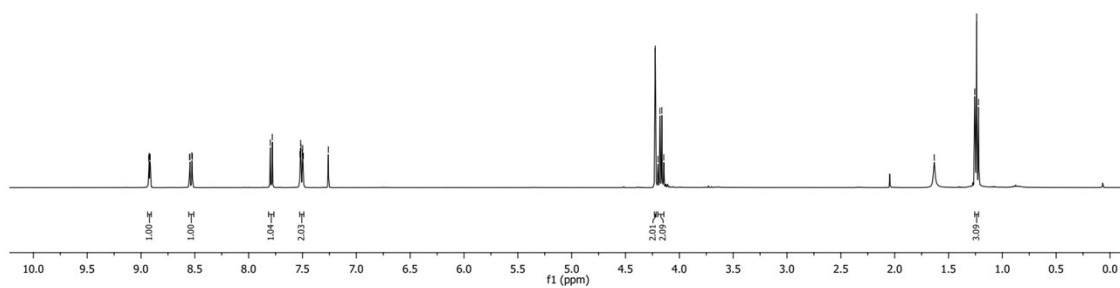

KT-196-13C

171.941

150.334  
147.514

135.803  
133.875  
130.675  
130.100  
127.815  
122.387  
121.259

77.478  
77.160  
76.843

60.980

37.234

14.334

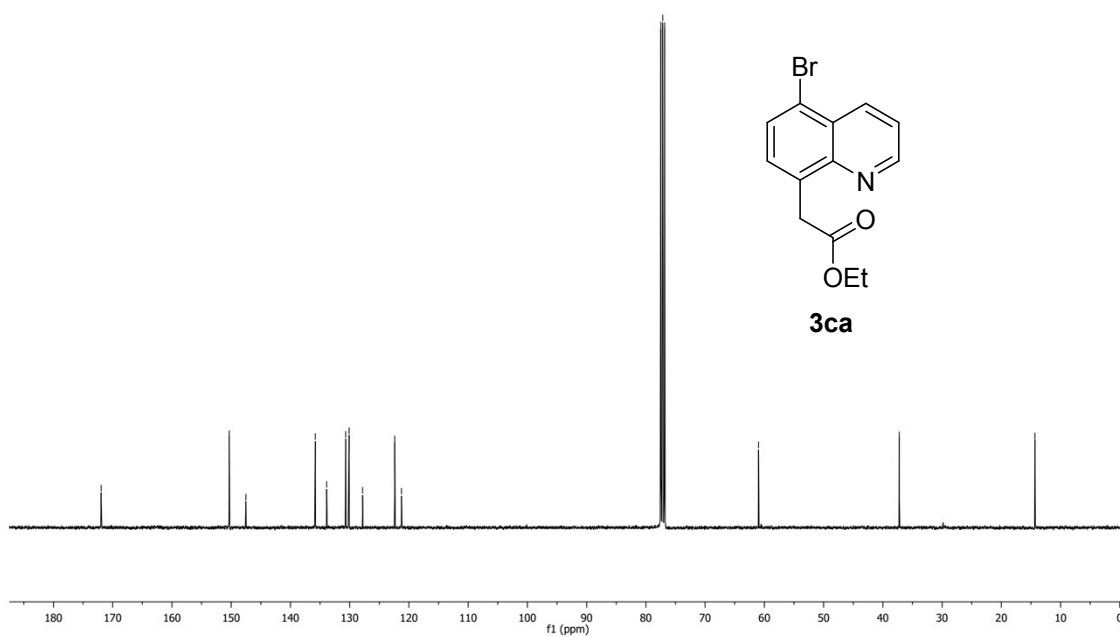

KT-203-1H

9.042  
9.038  
9.017  
9.008  
9.003  
8.364  
8.345  
7.756  
7.662  
7.651  
7.640  
7.629  
7.260

4.339  
4.309  
4.282  
4.174  
4.156

1.261  
1.243  
1.226

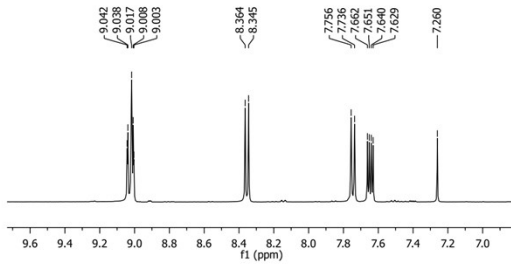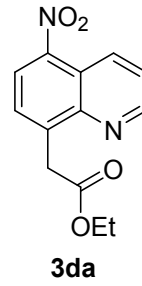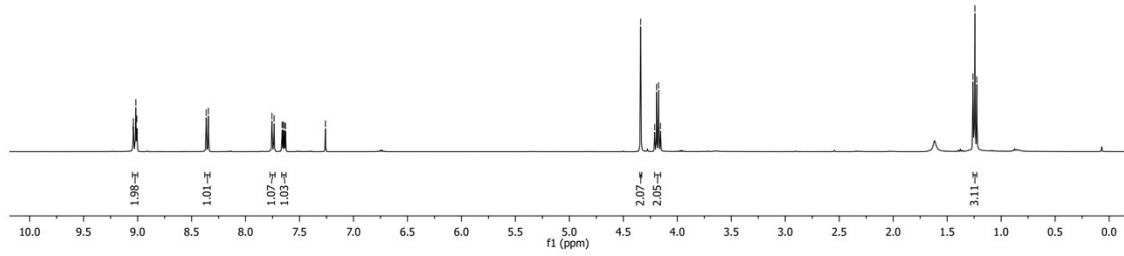

KT-203-13C

171.135  
160.776  
146.630  
144.992  
141.791  
132.317  
128.601  
124.488  
124.027  
121.359  
77.478  
77.161  
76.842  
61.236  
37.955  
14.305

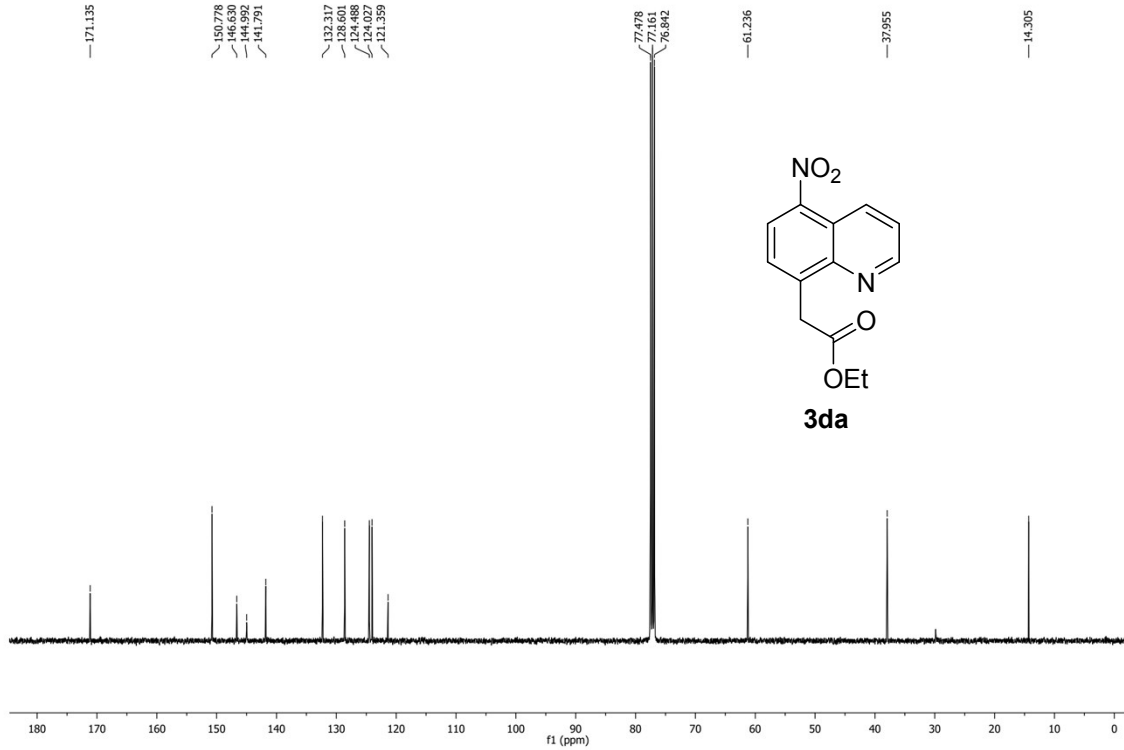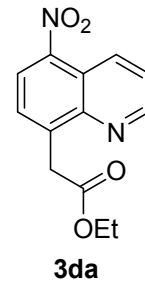

KT-200-1H

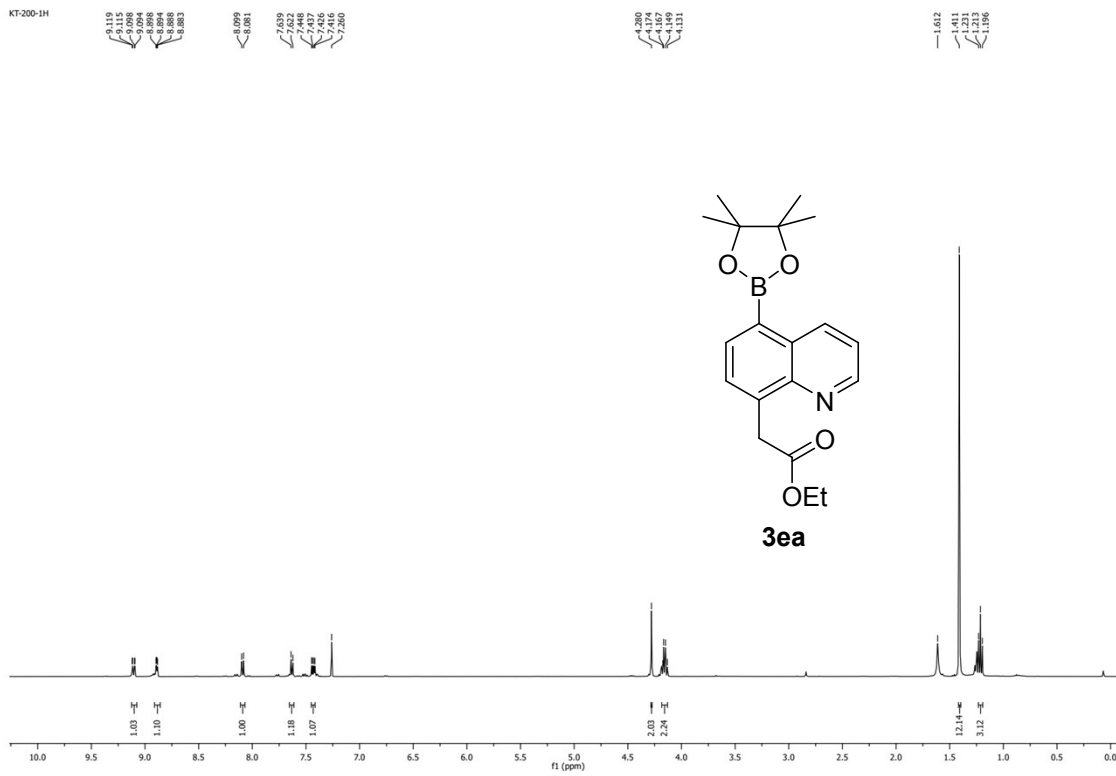

KT-200-13C

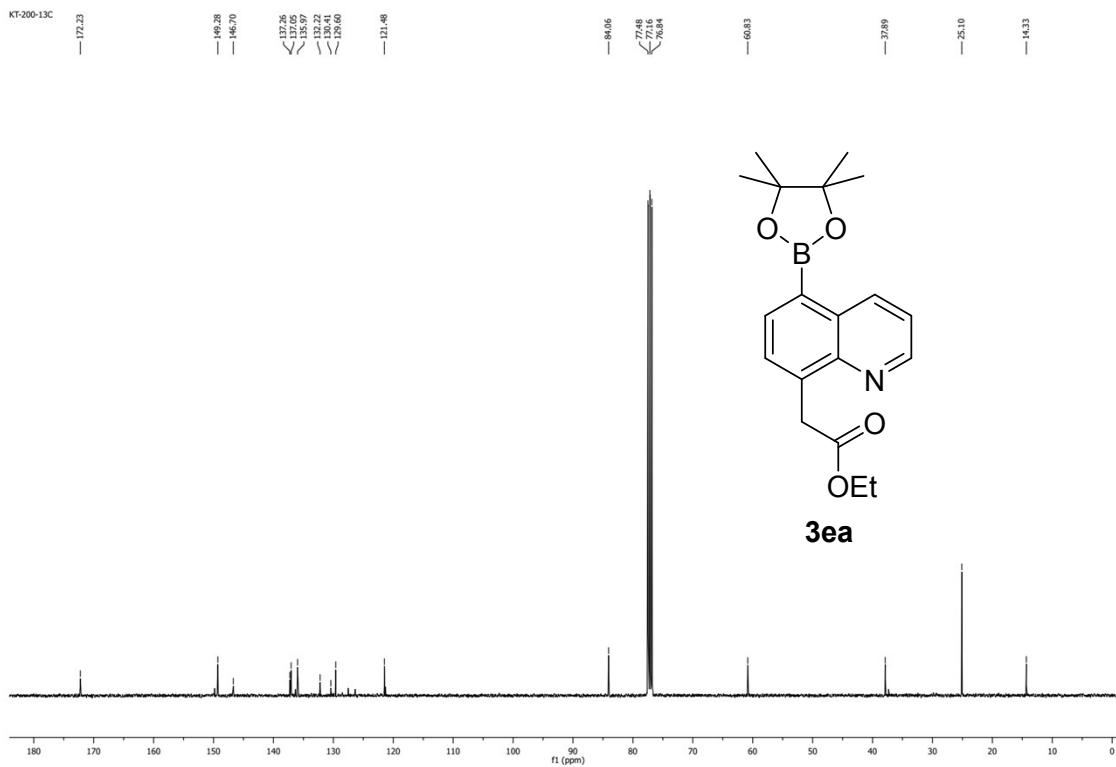

KT-216-A-1H

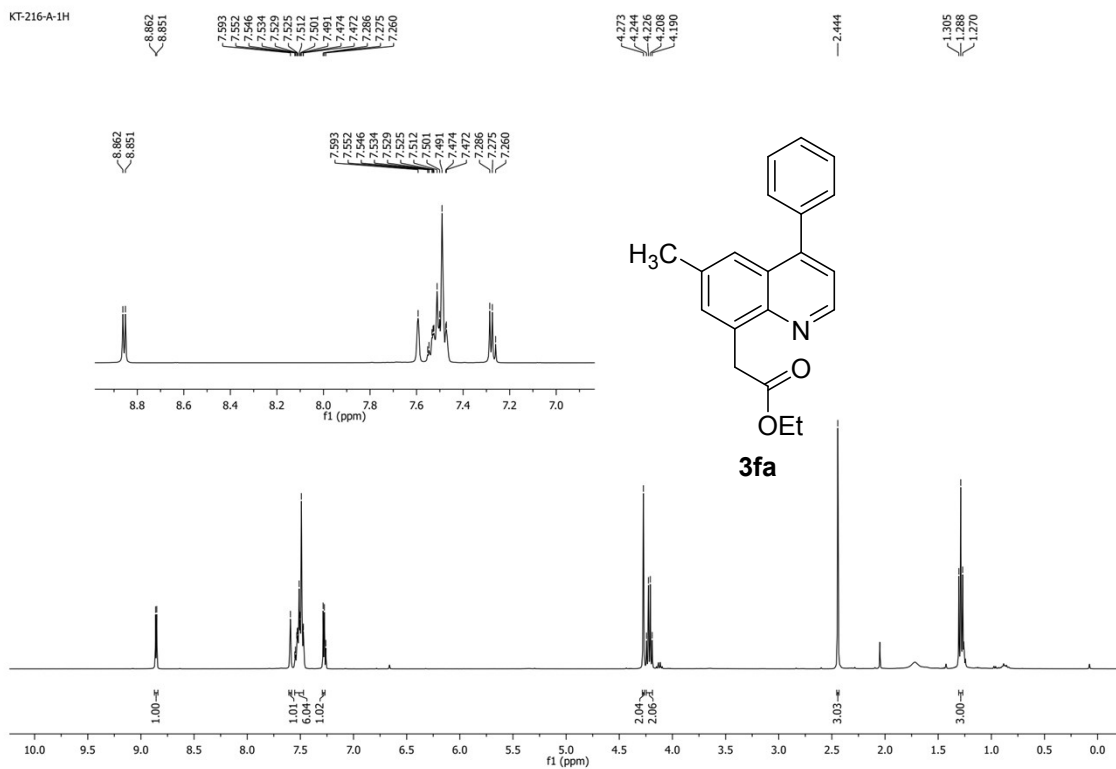

KT-216-A-13C

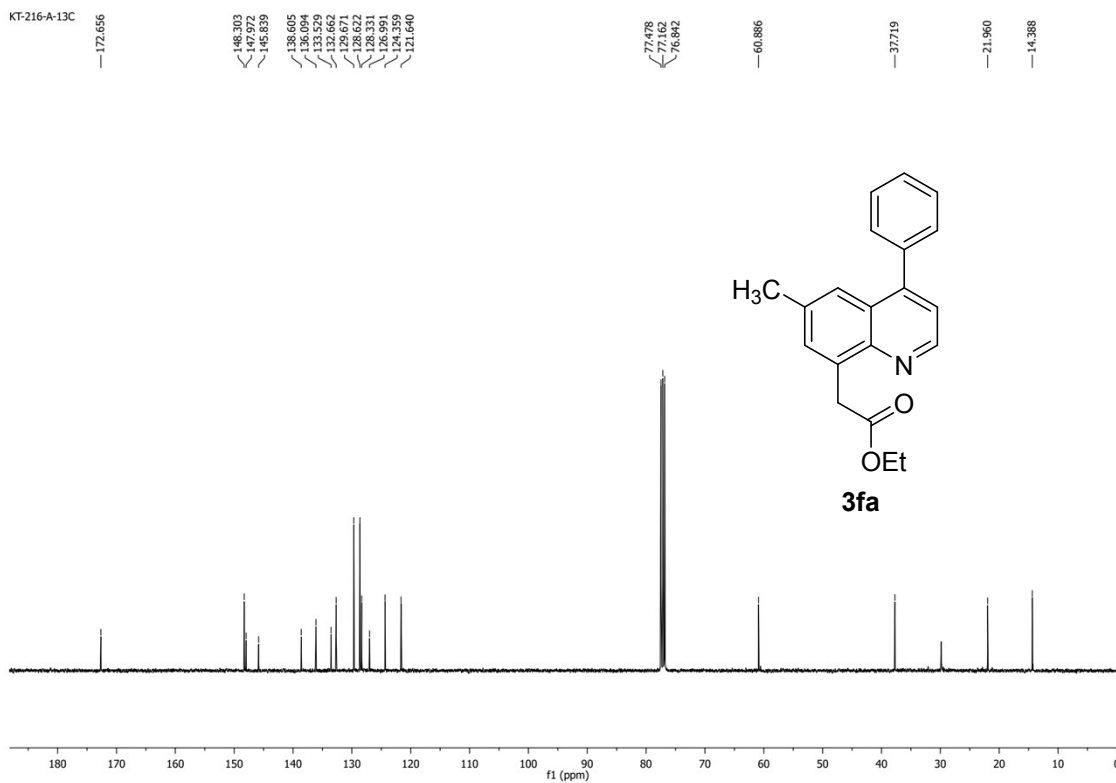

KT-225-1H

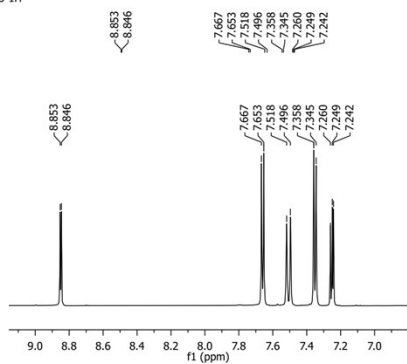

4.260  
4.226  
4.214  
4.202  
4.191

2.449

1.294  
1.282  
1.270

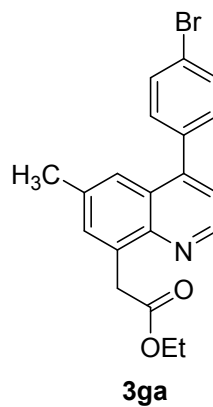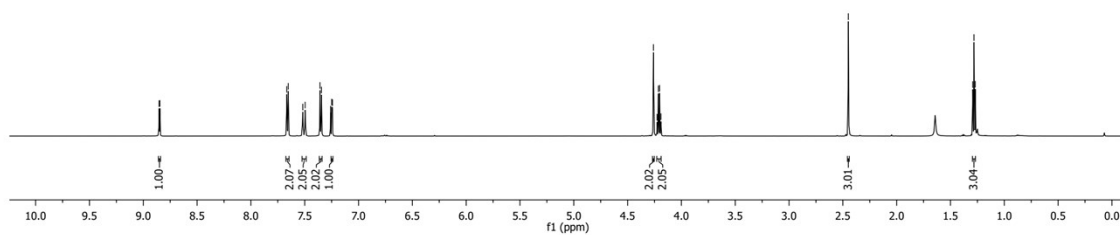

KT-225-13C

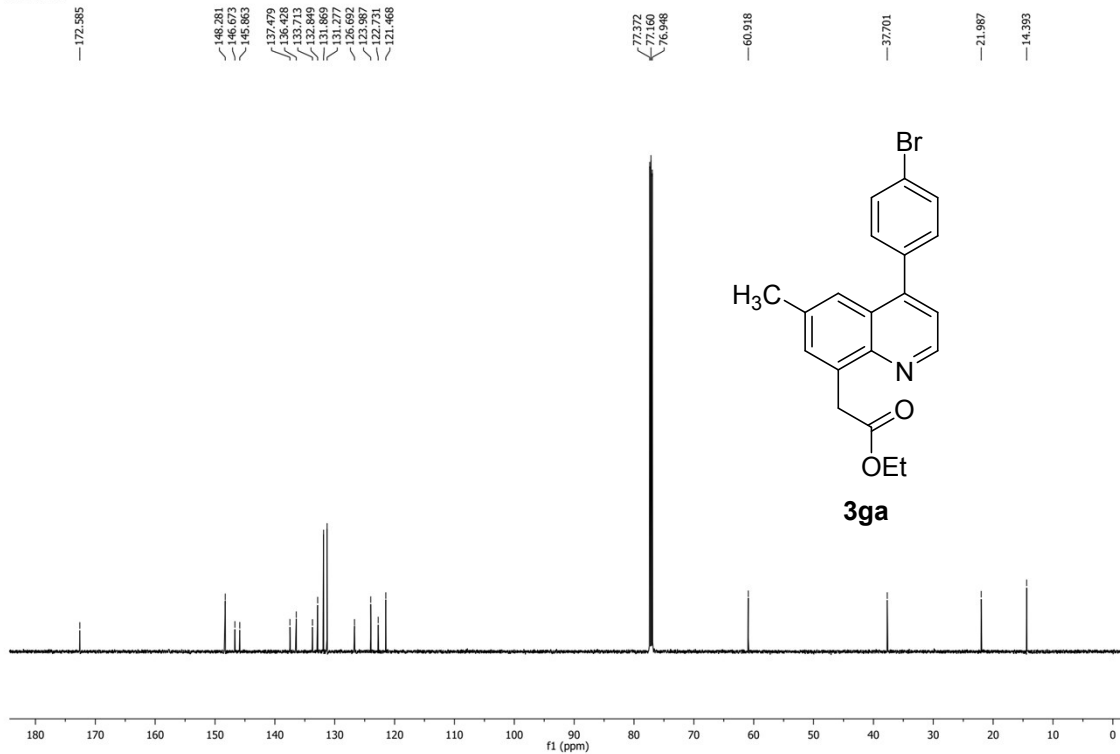

KT-231-1H

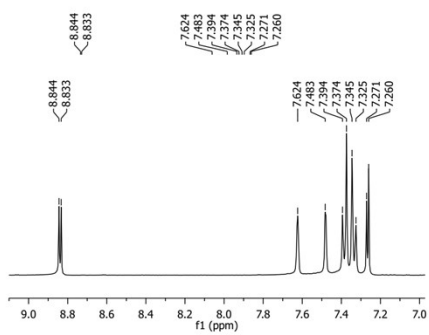

4.266  
4.239  
4.222  
4.205  
4.188

2.472  
2.443

1.301  
1.286  
1.266

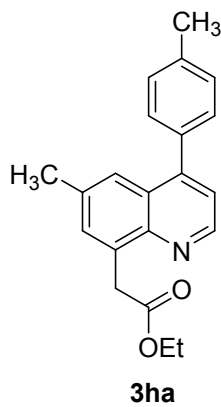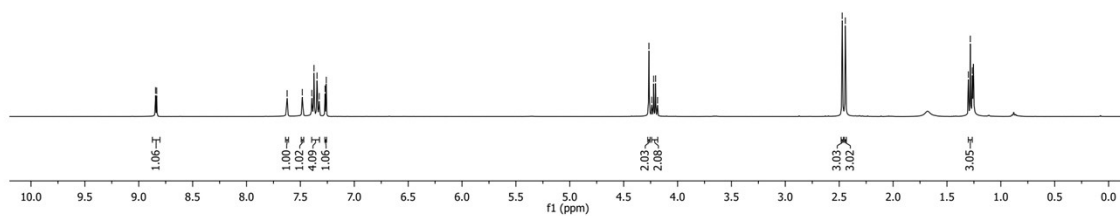

KT-231-13C

172.677

148.321  
148.212  
145.860

138.238  
135.964  
135.684  
133.502  
132.866  
129.343  
127.109  
124.440  
121.629

77.477  
77.160  
76.842

60.875

37.734

21.956  
21.451

14.395

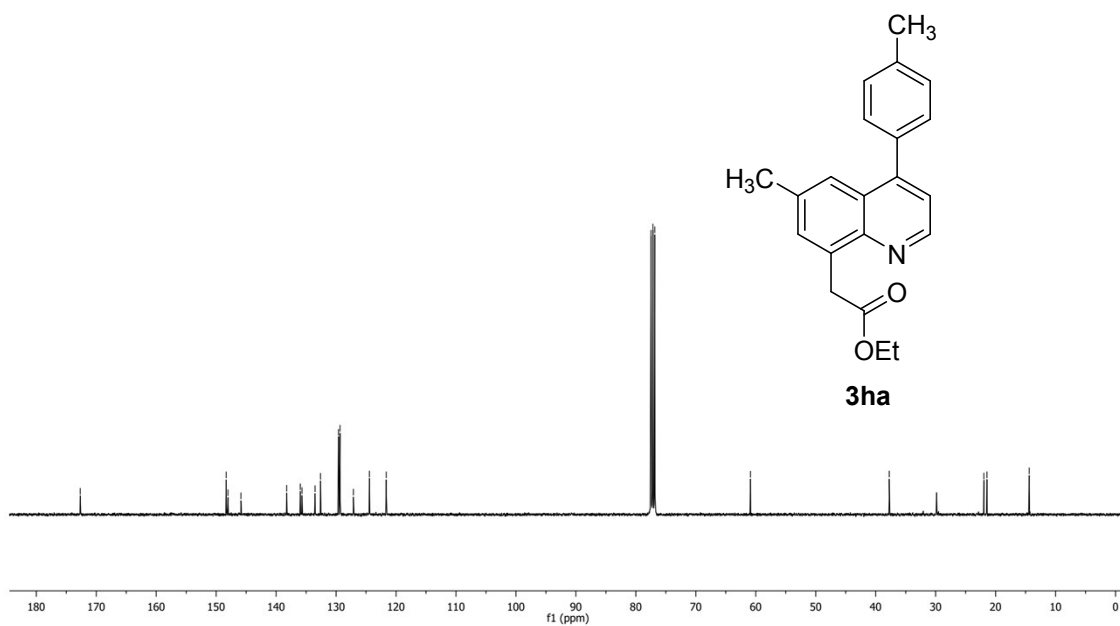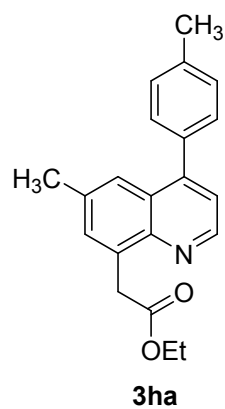

KT-223-1H

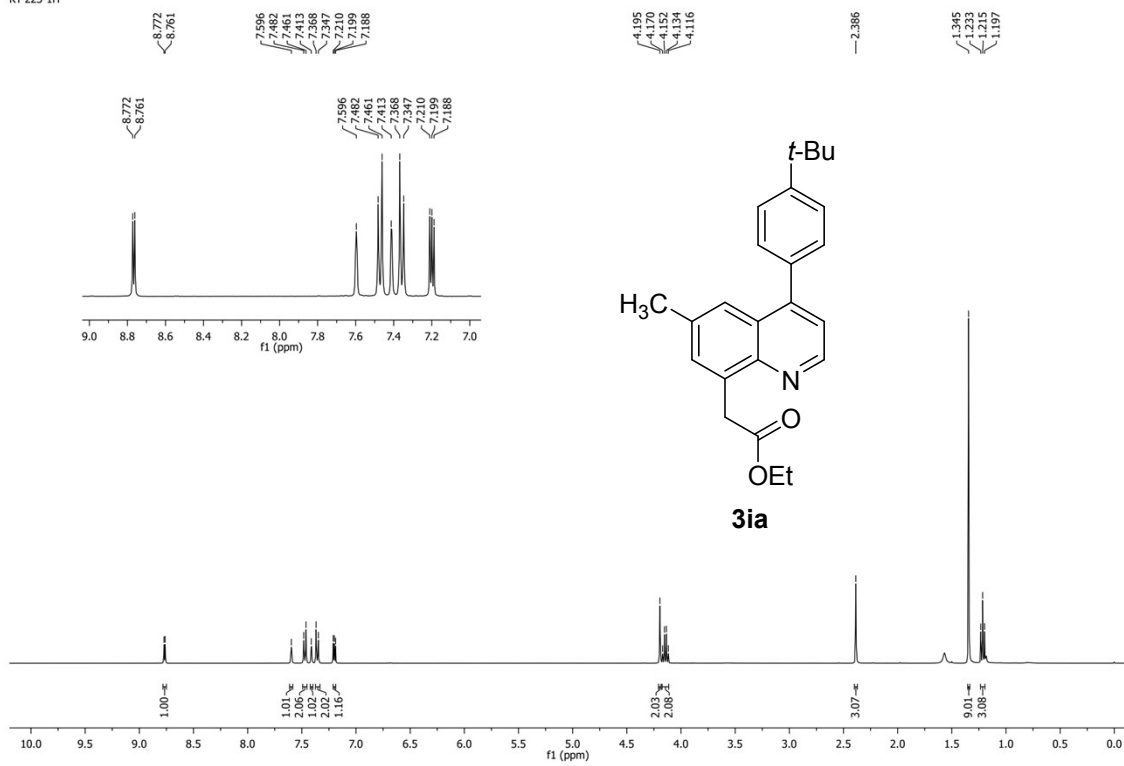

KT-223-13C

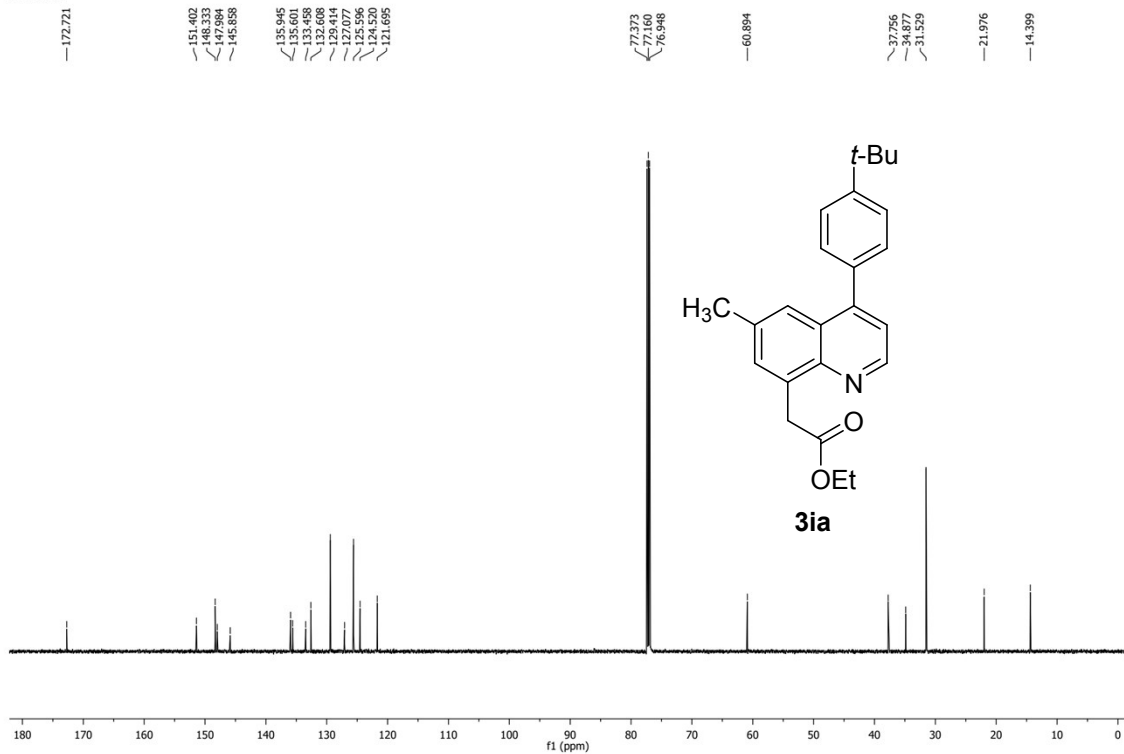



KT-249-1H

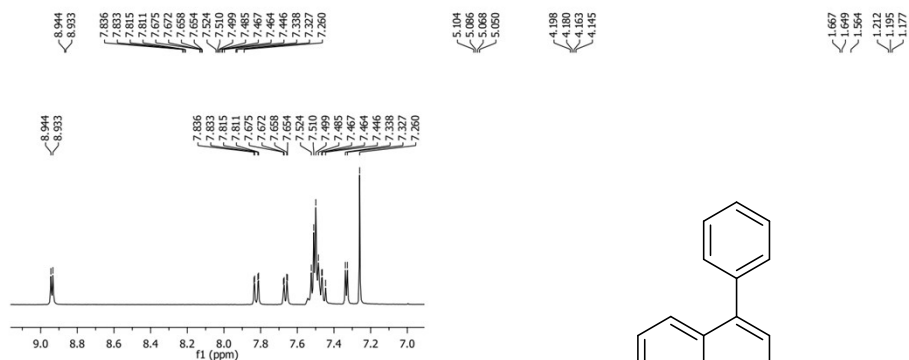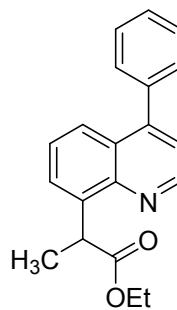

3ja

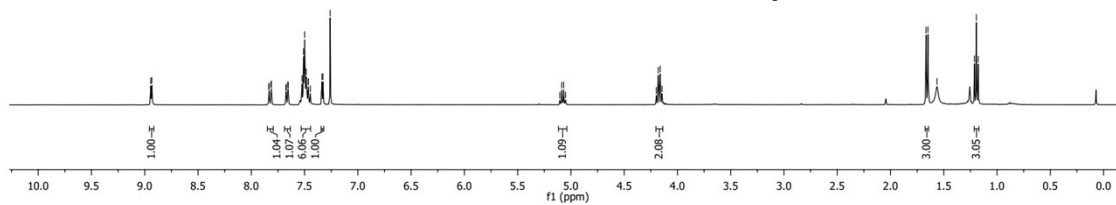

KT-249-13C

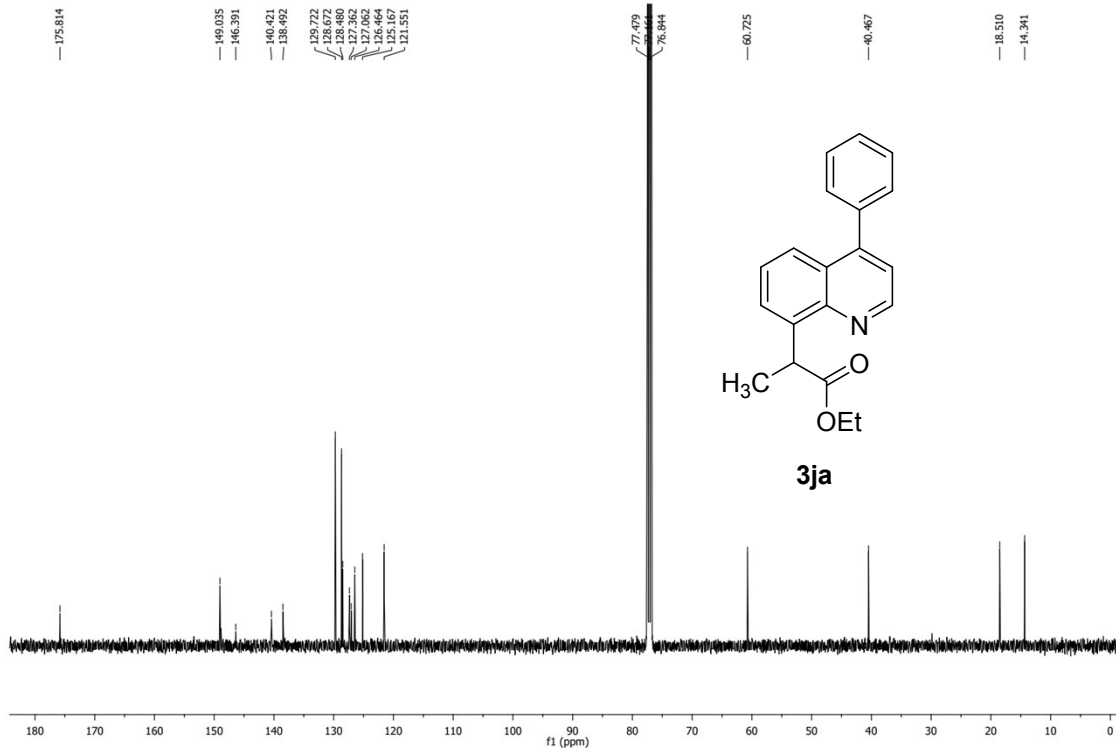

KT-235-1H

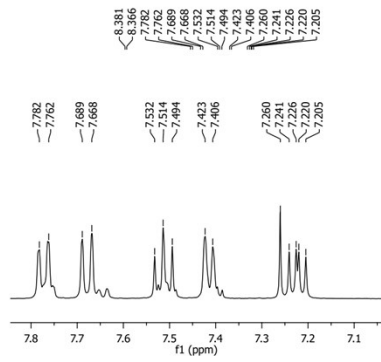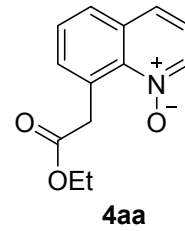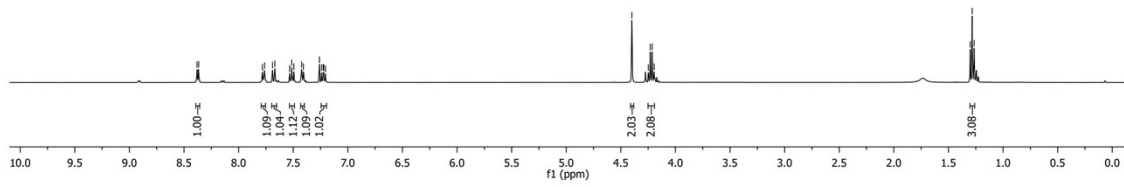

KT-235-13C

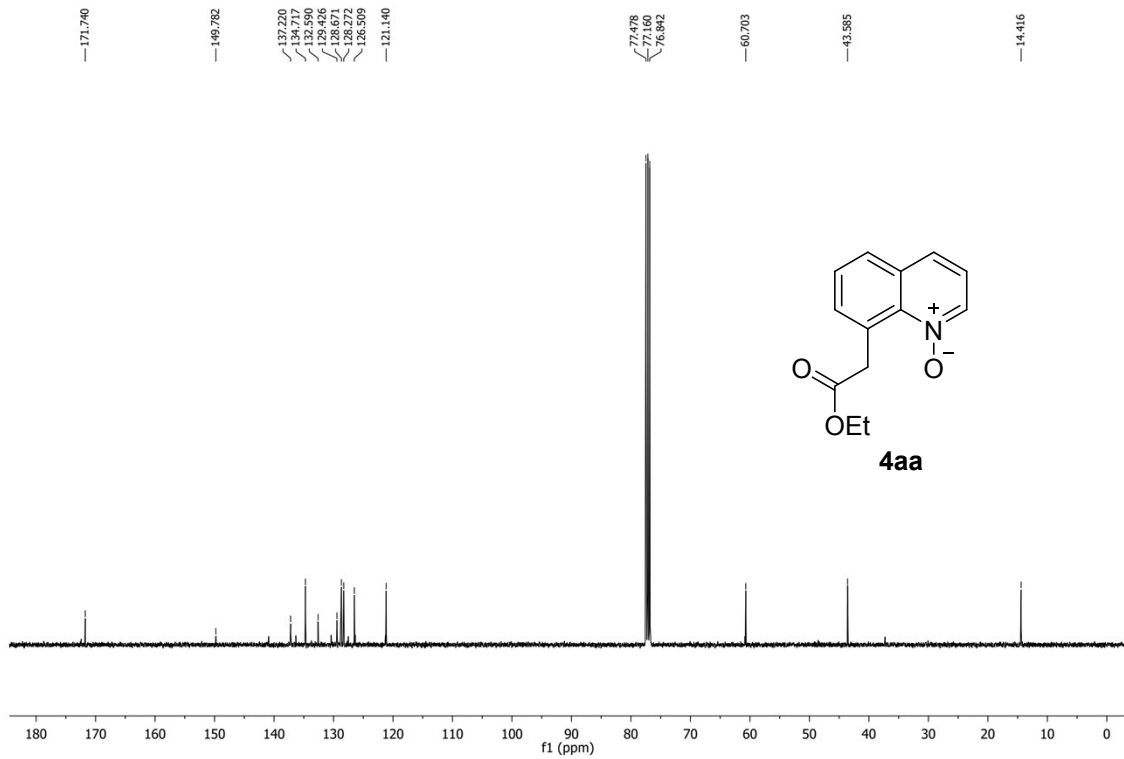

Supplement: d1cc00465d1.pdf [file d1cc00465d1.pdf]
